# Supplementary material
Source: PubMed Central journal article supplement (PMC4432846)

## Supporting Information

### Design and Synthesis of a Bombesin Peptide-conjugated Tripodal Phosphino Dithioether Ligand Topology for the Stabilization of the *fac*-[M(CO)<sub>3</sub>]<sup>+</sup> Core (M = <sup>99m</sup>Tc or Re)

Raghuraman Kannan, Nagavarakishore Pillarsetty, Hariprasad Gali, Timothy J. Hoffman, Charles L. Barnes, Silvia S. Jurisson, Charles J. Smith and Wynn A. Volkert

#### Table of Contents:

|                       |   |
|-----------------------|---|
| 1. C-13 NMR data..... | 2 |
| 2. NMR spectra.....   | 3 |

## 1. C-13 NMR data

(EtO)<sub>2</sub>P(O)CH<sub>2</sub>CH<sub>2</sub>SCH<sub>2</sub>CH<sub>2</sub>SH (1a): <sup>13</sup>C {<sup>1</sup>H} NMR (CDCl<sub>3</sub>, 75 MHz): δ 61.70 (d, P(O)CH<sub>2</sub>CH<sub>3</sub>), 35.94 (s, SCH<sub>2</sub>CH<sub>2</sub>S), 26.71 (d, J<sub>P-C</sub> = 136.80 Hz, P-CH<sub>2</sub>), 24.71 (d, <sup>2</sup>J<sub>P-C</sub> = 3.69 Hz, PCH<sub>2</sub>CH<sub>2</sub>S), 24.34 (s, CH<sub>2</sub>), 16.32 (d, P(O)CH<sub>2</sub>CH<sub>3</sub>).

H<sub>2</sub>PCH<sub>2</sub>CH<sub>2</sub>SCH<sub>2</sub>CH<sub>2</sub>SH (2): <sup>13</sup>C {<sup>1</sup>H} NMR (CDCl<sub>3</sub>, 75 MHz): δ 35.84 (s, SCH<sub>2</sub>), 34.97 (s, CH<sub>2</sub>), 24.61 (s, HSCH<sub>2</sub>), 14.83 (d, J<sub>P-C</sub> = 11.45 Hz, P-CH<sub>2</sub>)

H<sub>2</sub>PCH<sub>2</sub>CH<sub>2</sub>SCH<sub>2</sub>CH<sub>2</sub>SCH<sub>3</sub> (3): <sup>13</sup>C {<sup>1</sup>H} NMR (CDCl<sub>3</sub>, 75 MHz): δ 35.14 (s, SCH<sub>2</sub>), 34.03 (s, CH<sub>2</sub>), 31.34 (s, SCH<sub>2</sub>), 15.40 (s, SCH<sub>3</sub>), 14.77 (d, J<sub>P-C</sub> = 11.20 Hz, P-CH<sub>2</sub>);  
<sup>31</sup>P {<sup>1</sup>H} NMR (CDCl<sub>3</sub>, 121 MHz) : δ -141.13 (s).

[(HOCH<sub>2</sub>)<sub>3</sub>PCH<sub>2</sub>CH<sub>2</sub>SCH<sub>2</sub>CH<sub>2</sub>SCH<sub>3</sub>]Cl (4a): <sup>13</sup>C {<sup>1</sup>H} NMR (D<sub>2</sub>O, 75 MHz): δ 50.21 (d, J<sub>P-C</sub> = 53.74 Hz, P-CH<sub>2</sub>), 32.58 (s, SCH<sub>2</sub>), 30.25 (s, CH<sub>2</sub>), 22.74 (d, J<sub>P-C</sub> = 5.24 Hz, SCH<sub>2</sub>CH<sub>2</sub>P), 14.87 (d, J<sub>P-C</sub> = 38.19 Hz, SCH<sub>2</sub>CH<sub>2</sub>P), 13.85 (s, SCH<sub>3</sub>).

H<sub>2</sub>PCH<sub>2</sub>CH<sub>2</sub>SCH<sub>2</sub>CH<sub>2</sub>SCH<sub>2</sub>COO<sup>t</sup>Bu (7): <sup>13</sup>C {<sup>1</sup>H} NMR (CDCl<sub>3</sub>, 75 MHz): δ 169.30 (s, COO<sup>t</sup>Bu), 81.32 (s, COOC(CH<sub>3</sub>)<sub>3</sub>), 34.92 (s, SCH<sub>2</sub>CO), 34.56 (s, SCH<sub>2</sub>), 32.18 (s, SCH<sub>2</sub>), 27.80 (s, SCH<sub>2</sub>), 14.71 (d, J<sub>P-C</sub> = 11.25 Hz, P-CH<sub>2</sub>).

H<sub>2</sub>PCH<sub>2</sub>CH<sub>2</sub>SCH<sub>2</sub>CH<sub>2</sub>SCH<sub>2</sub>COOH (8): <sup>13</sup>C {<sup>1</sup>H} NMR (CDCl<sub>3</sub>, 75 MHz): δ 175.62 (s, COOH), 35.06 (s, SCH<sub>2</sub>CO), 32.45 (s, SCH<sub>2</sub>), 31.14 (s, SCH<sub>2</sub>), 27.84 (s, SCH<sub>2</sub>), 14.71 (d, J<sub>P-C</sub> = 11.25 Hz, P-CH<sub>2</sub>).

2.  $^1\text{H}$ ,  $^{13}\text{C}$ ,  $^{31}\text{P}\{^1\text{H}\}$  and  $^{31}\text{P}$  NMR Spectra of compounds synthesized in the present study:

<sup>31</sup>P NMR

(CDCl<sub>3</sub>, 300 MHz)

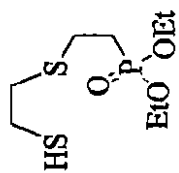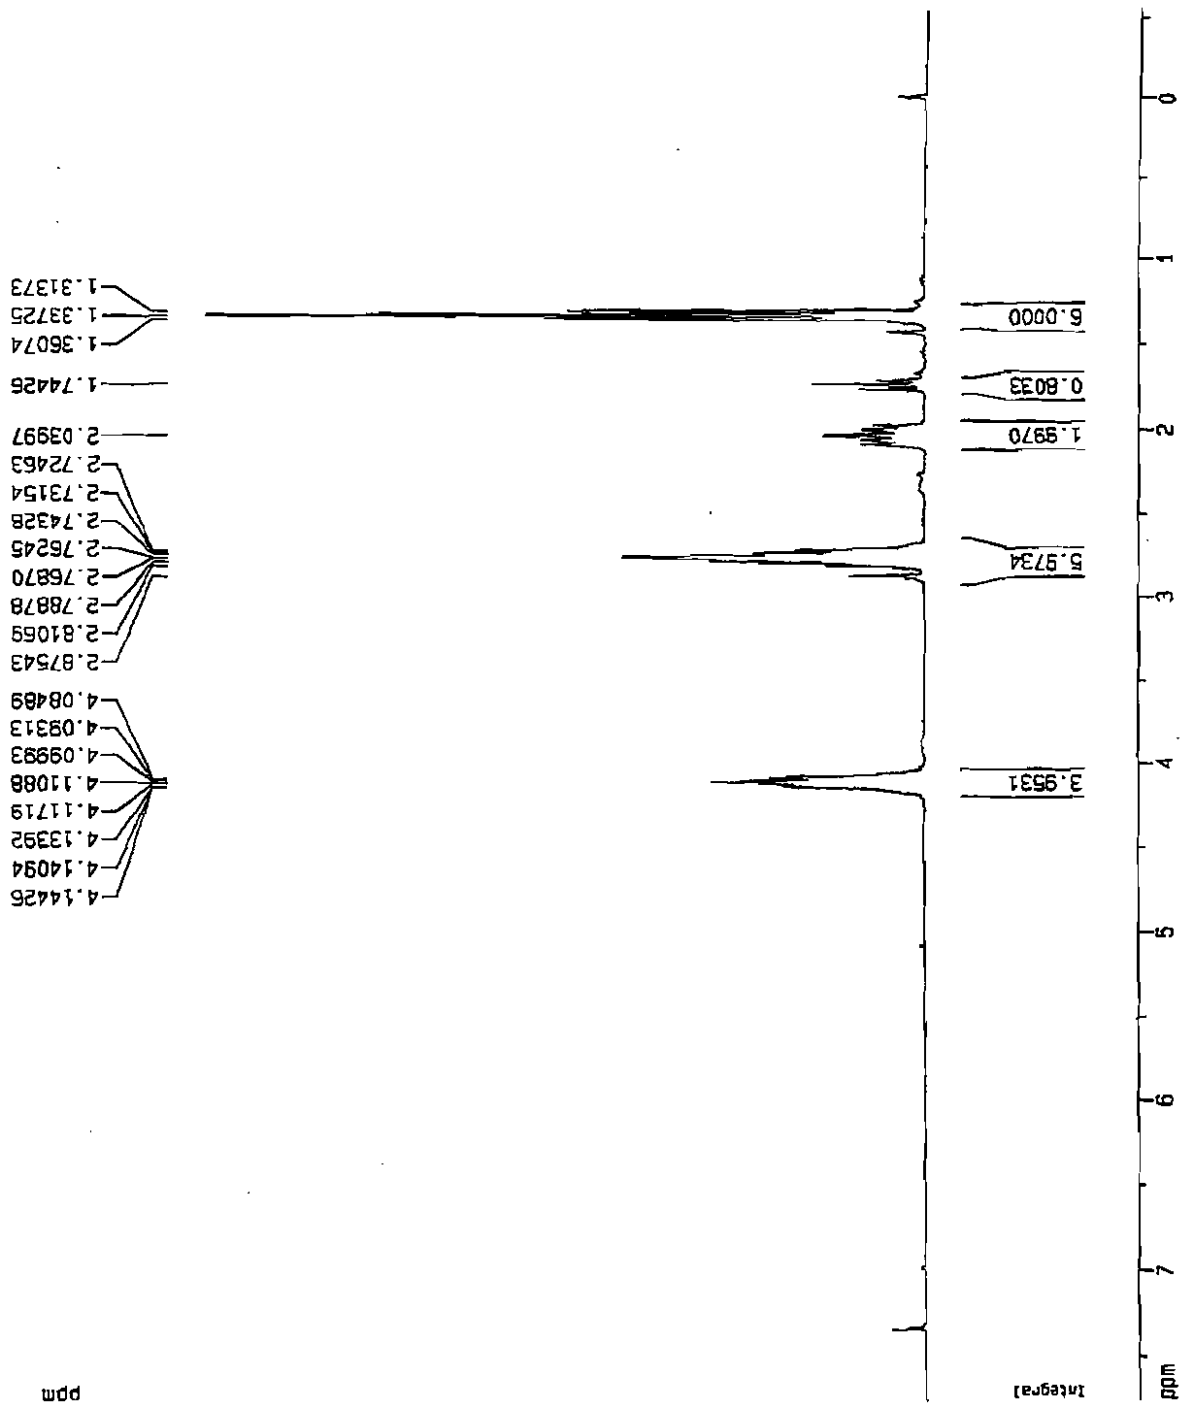

ppm

Integral

ppm

ppm

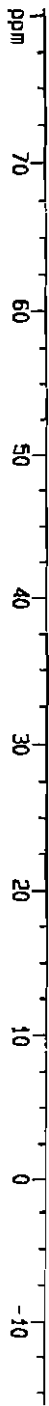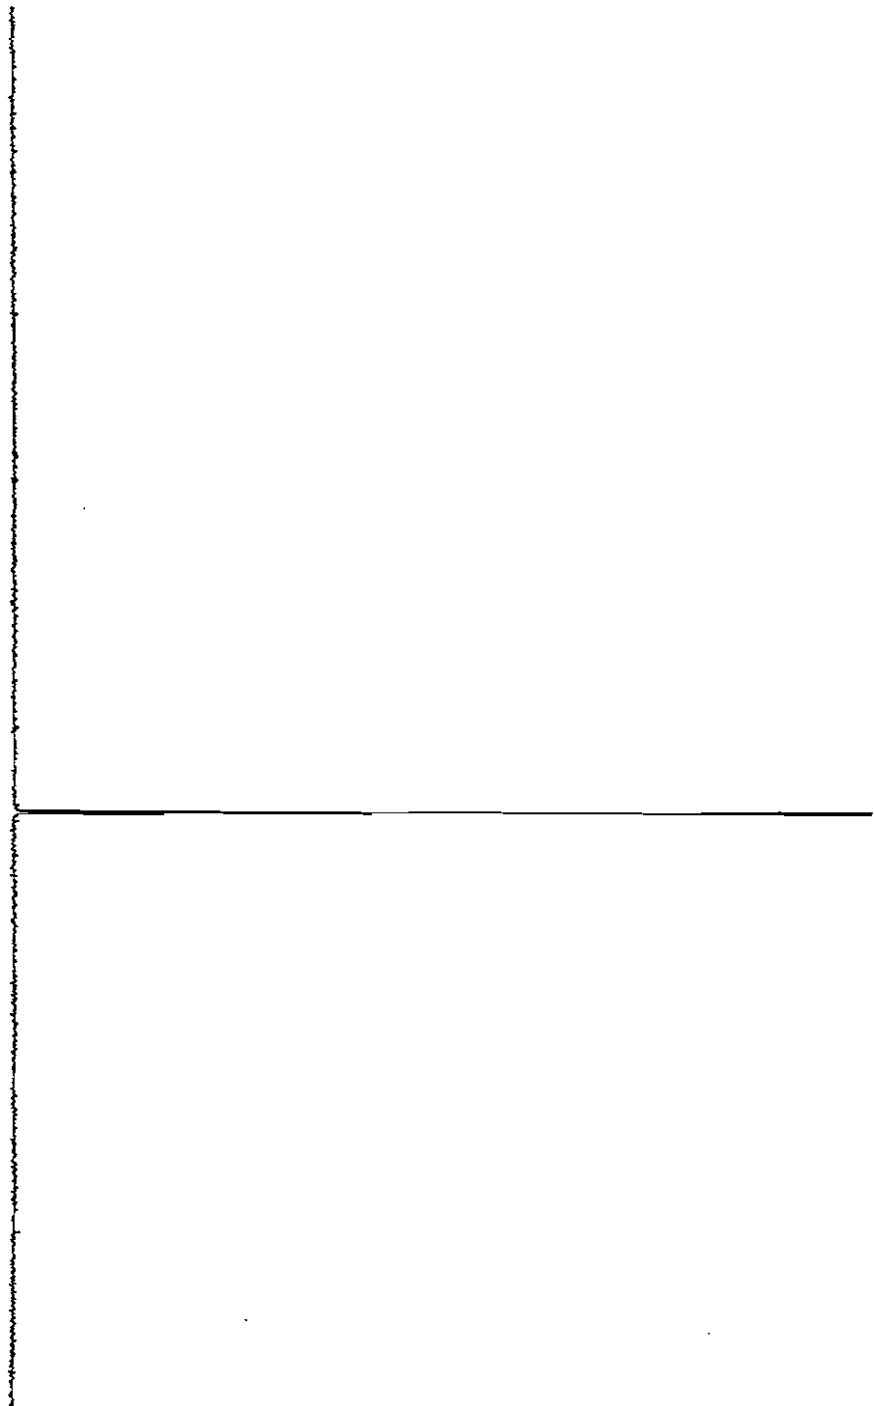

25.3005

$^{31}\text{P}\{^1\text{H}\}_3 \text{NMR}$   
( $\text{CDCl}_3$ , 121 MHz)

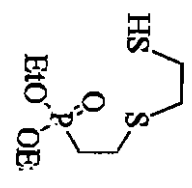

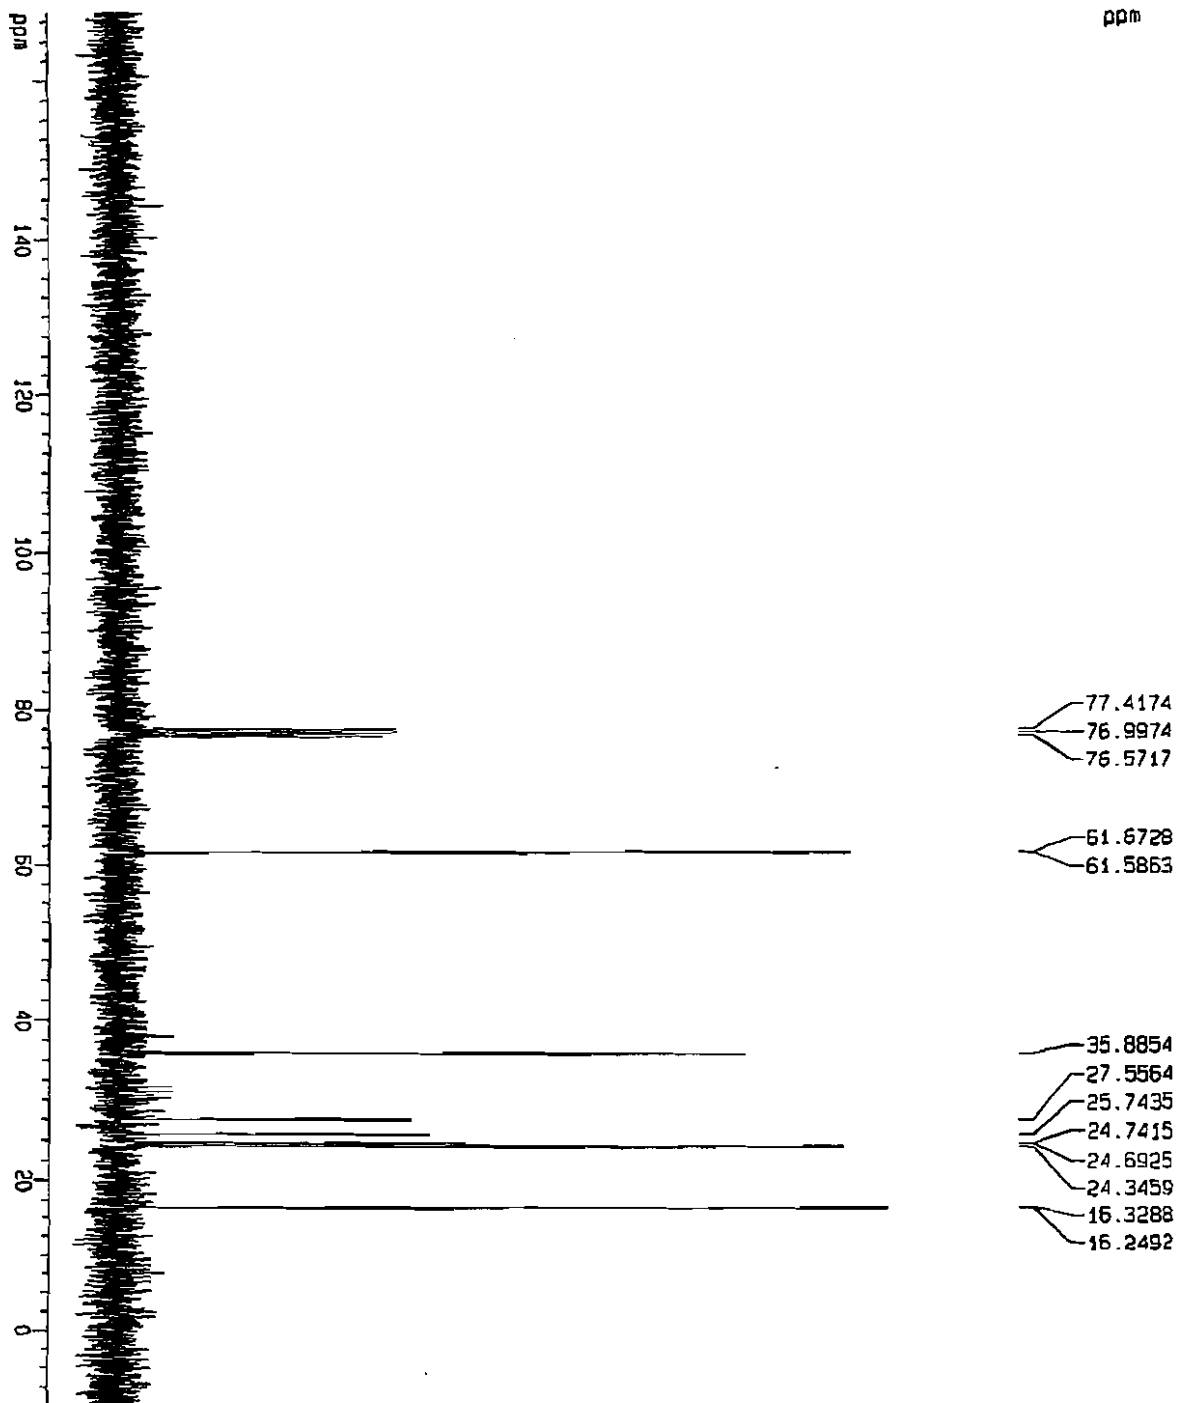

<sup>13</sup>C NMR  
(CD<sub>3</sub>, 75 MHz)

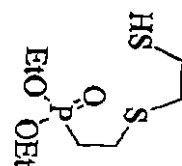

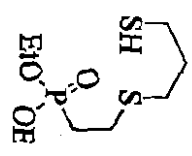

$^3\text{1P}\{^1\text{H}\}_3\text{NMR}$   
 $\text{CDCl}_3, 121\text{ MHz}$

ppm

25.1546

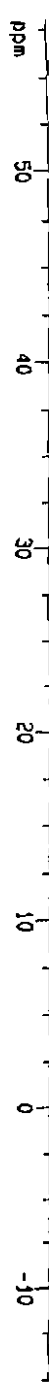

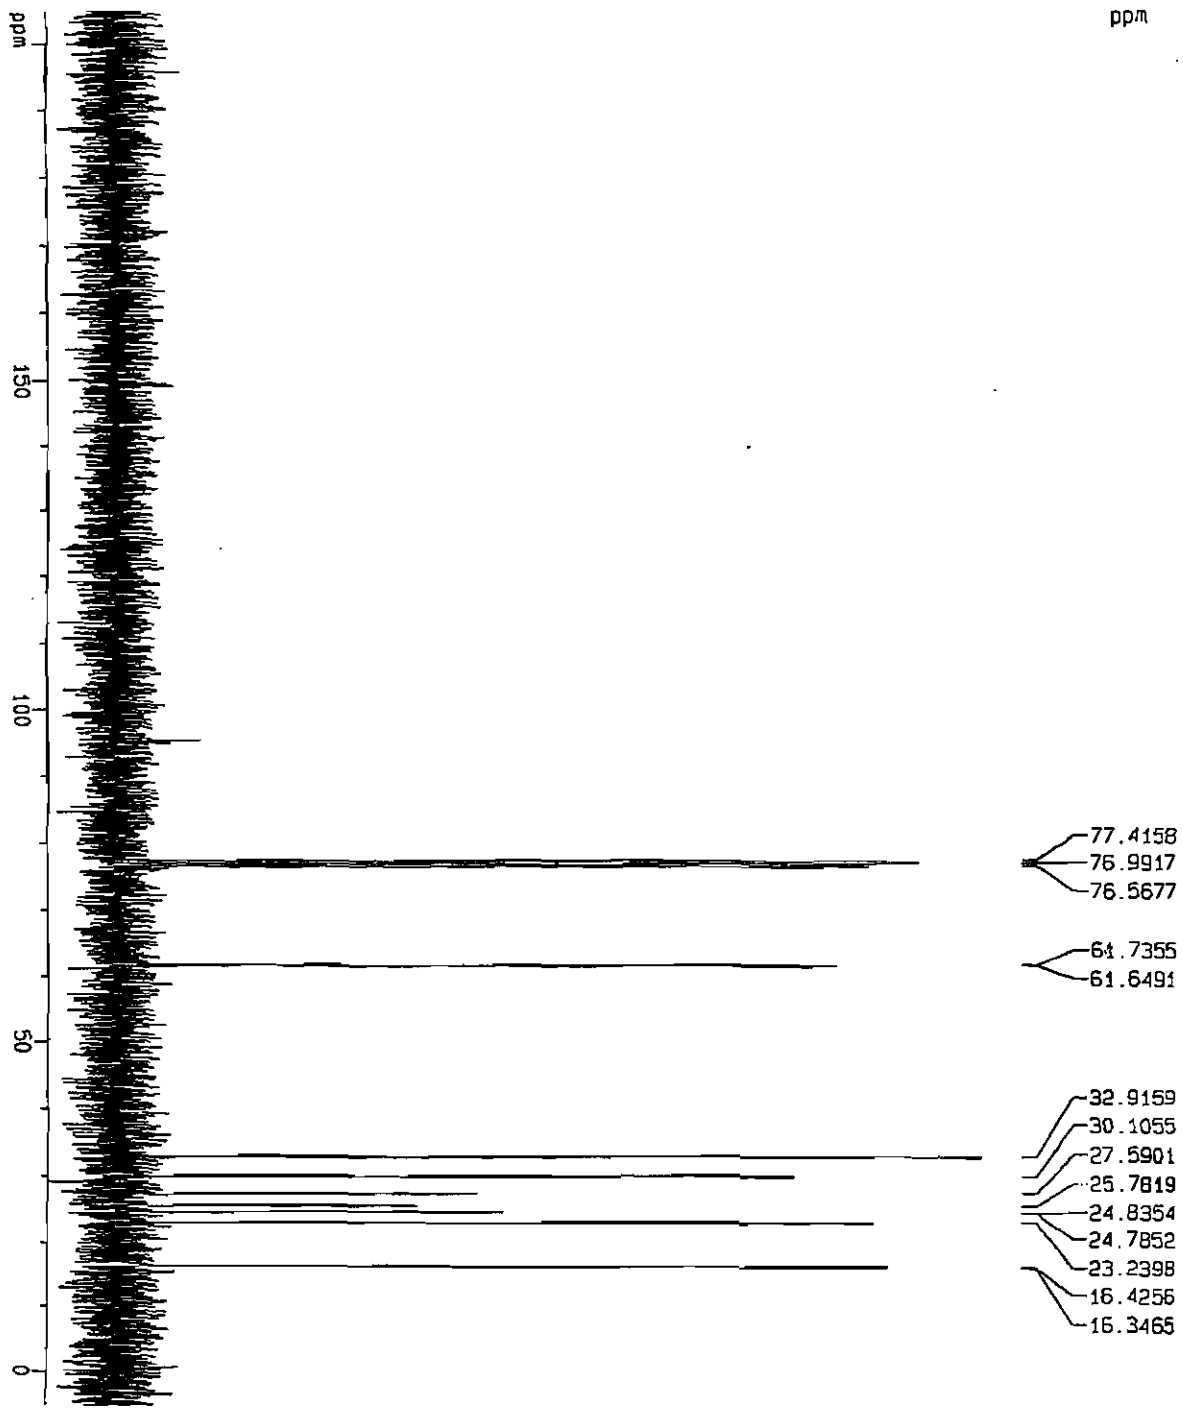

<sup>13</sup>C NMR  
CDCl<sub>3</sub>, 75 MHz

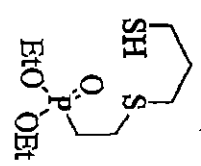

- 77.4158
- 76.9917
- 76.5677
- 61.7355
- 61.6491
- 32.9159
- 30.1055
- 27.5901
- 25.7819
- 24.8354
- 24.7852
- 23.2398
- 16.4256
- 15.3465



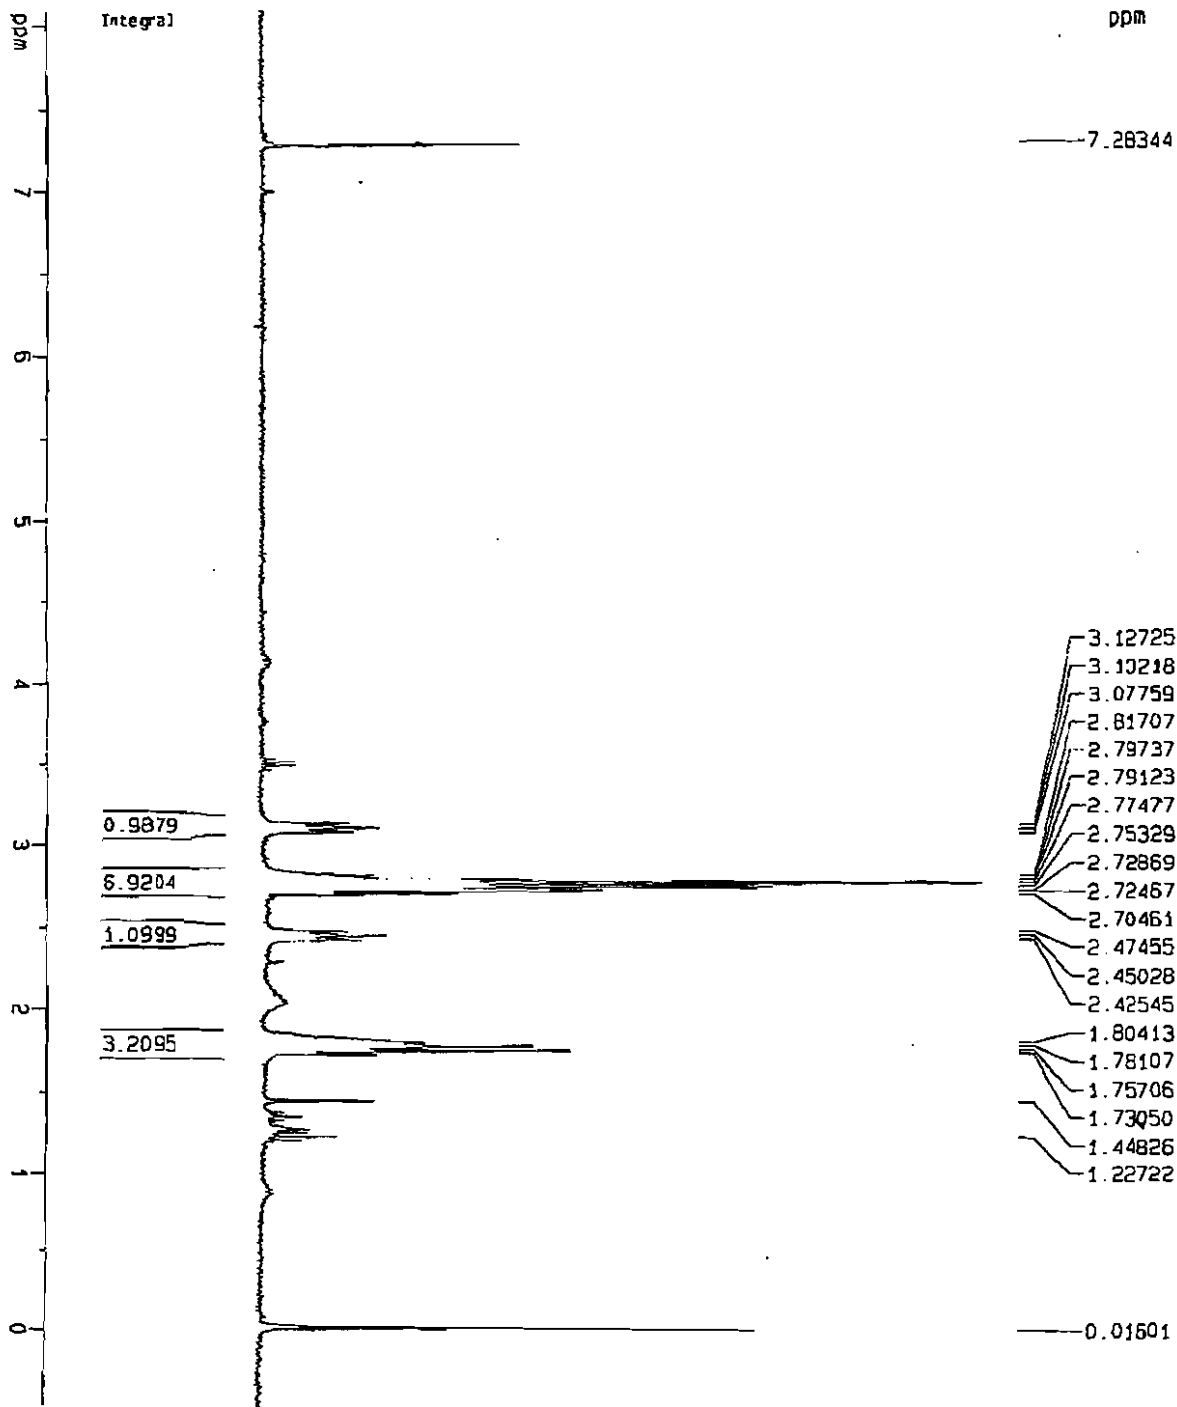

<sup>1</sup>H NMR  
 (CDCl<sub>3</sub>, 300 MHz)

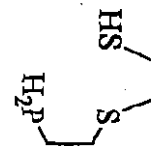

ppm

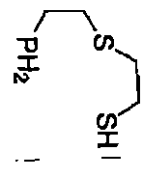

<sup>13</sup>C NMR

(CDCl<sub>3</sub>, 75 MHz)

77.4201  
76.9948  
76.5716

35.8426  
34.9789

24.6153

14.9080  
14.7563

ppm  
200  
150  
100  
50  
0

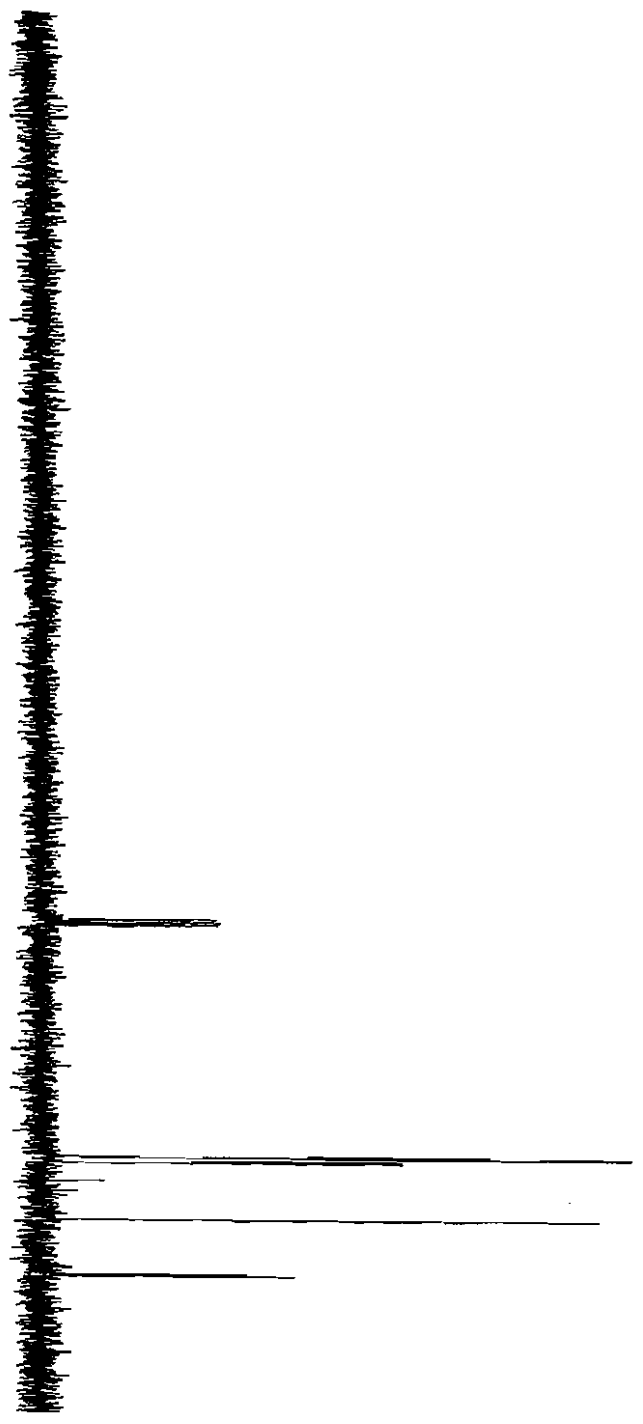

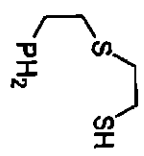

<sup>31</sup>P NMR

(CDCl<sub>3</sub>, 121 MHz)

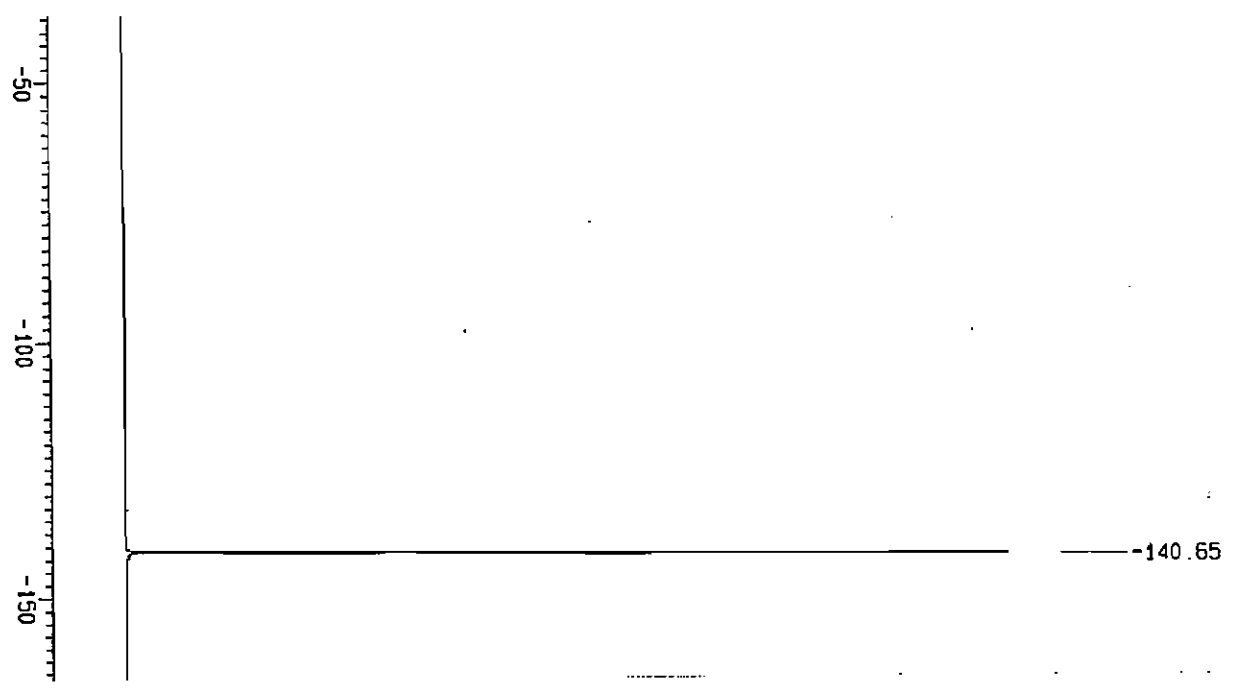

ppm

ppm  
200  
150  
100  
50  
0  
-50  
-100  
-150

$^3\text{P}\{^1\text{H}\}$  NMR  
( $\text{CDCl}_3$ , 121.5 MHz)

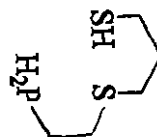

-141.46

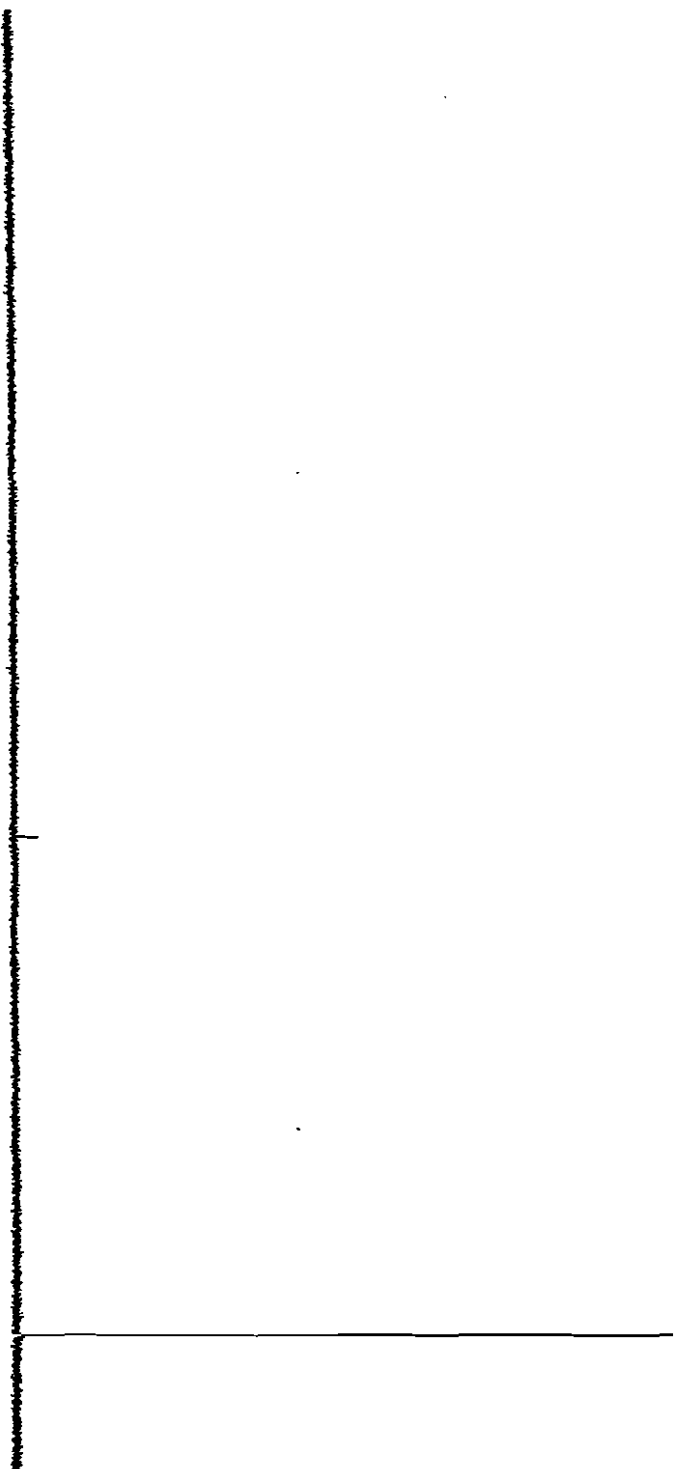

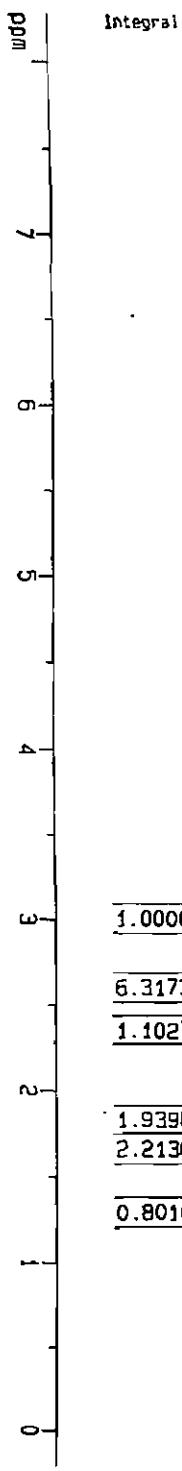

1H NMR  
(CDCl<sub>3</sub>, 300MHz)

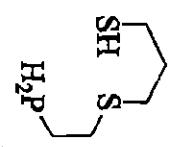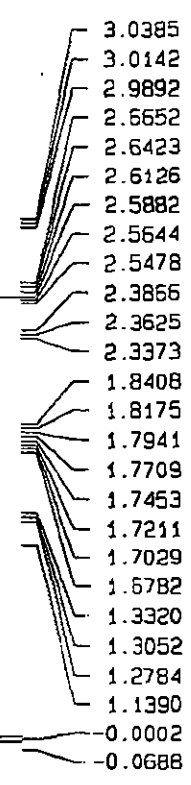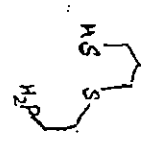

ppm  
70  
60  
50  
40  
30  
20  
10

ppm  
77.4793  
77.0560  
76.6318

1,2-ETHANEDITHIOL  
(CDCl<sub>3</sub>, 75MHz)

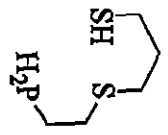

35.0766  
33.1953  
30.0873  
23.3600  
14.8642  
14.7189

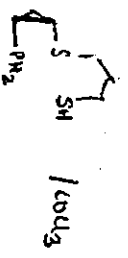

0.9551

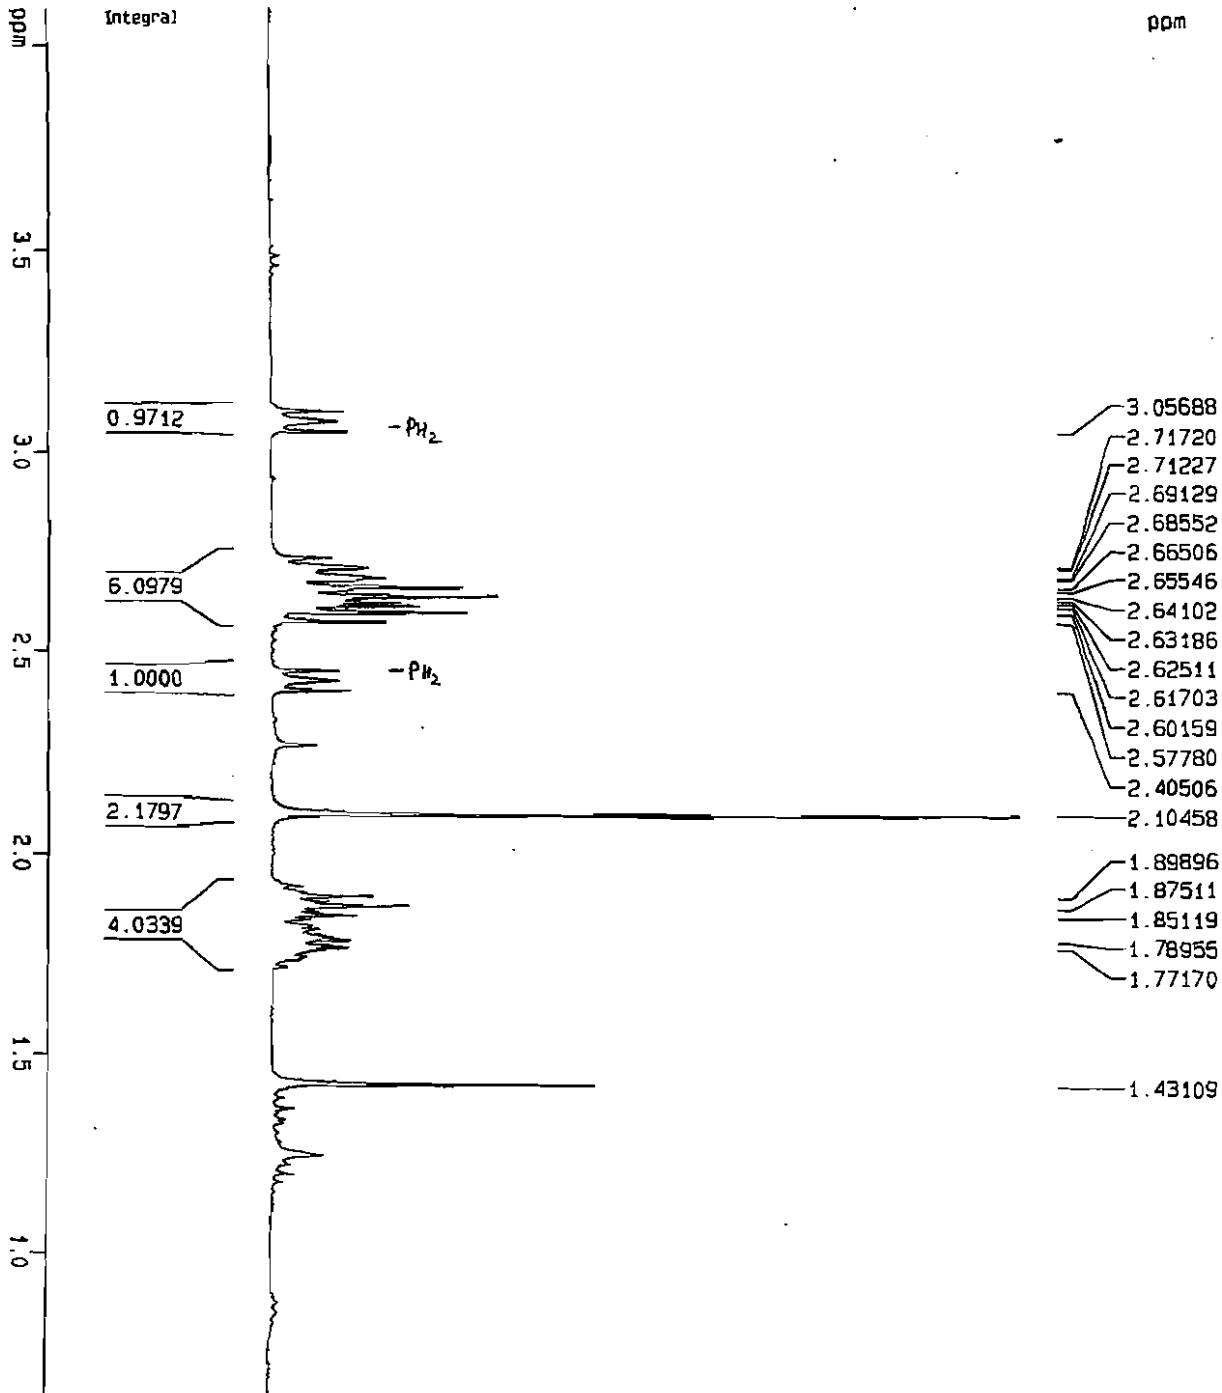

1H NMR  
(CDCl<sub>3</sub>, 300 MHz)

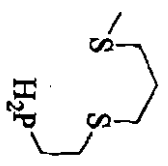

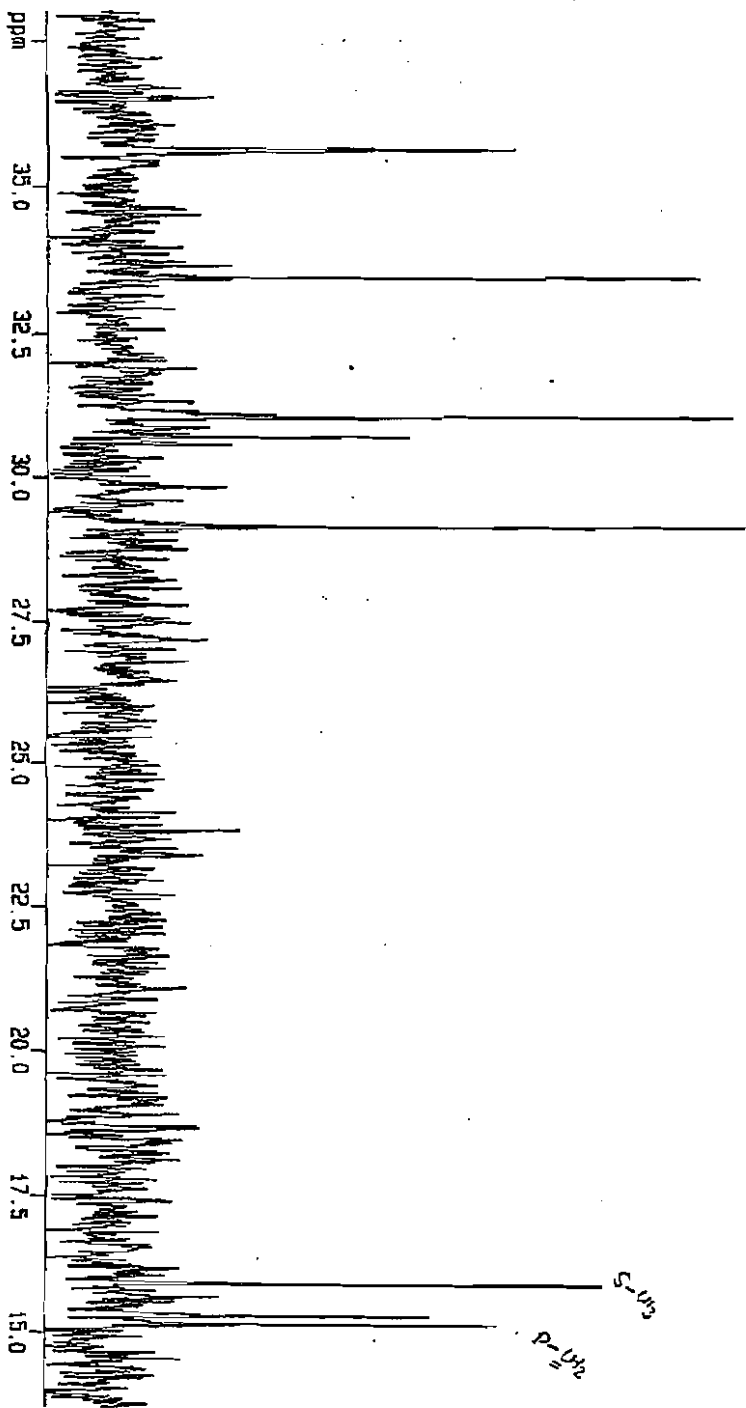

- ppm
- 35.6091
  - 33.4432
  - 31.0413
  - 30.7027
  - 29.1375

- 15.9051
- 15.3155
- 15.1711

<sup>13</sup>C NMR  
(CDCl<sub>3</sub>, 75 MHz)

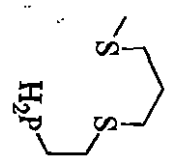

13C / 13C



31P{1H} NMR  
CDCl<sub>3</sub>, 121.5 MHz

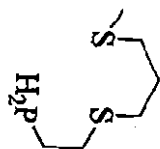

ppm

-144.31

ppm  
200  
100  
0  
-100  
-200

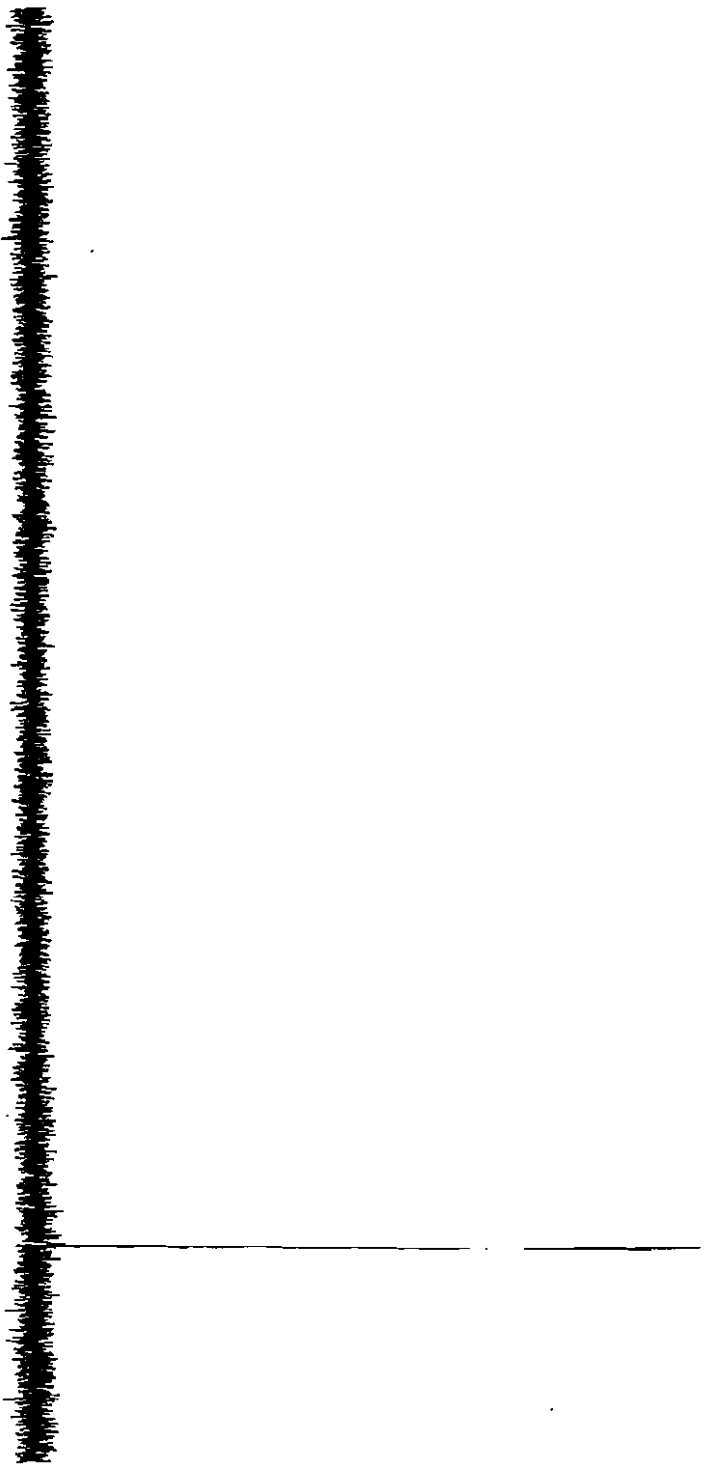

ppm  
200  
100  
0  
-100  
-200

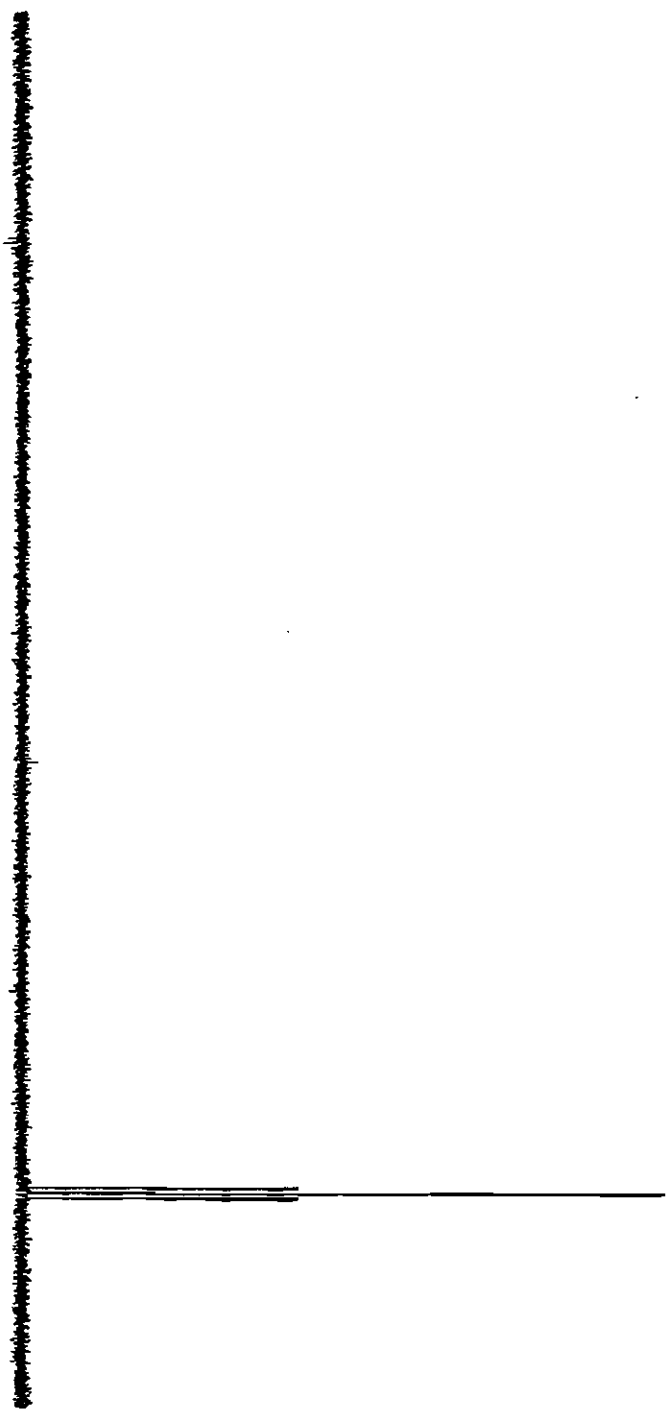

ppm

31P NMR  
(100% B1 MHz)

- 139.11
- 139.15
- 139.20
- 140.72
- 140.76
- 140.80
- 142.33
- 142.38
- 142.42

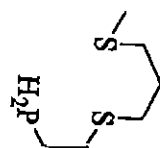

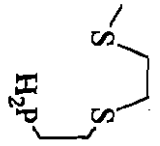

ppm

139.11  
139.15  
139.20

140.72  
140.75  
140.80

142.33  
142.38  
142.42

<sup>31</sup>P NMR  
CDCl<sub>3</sub>

ppm  
-137  
-138  
-139  
-140  
-141  
-142  
-143  
-144

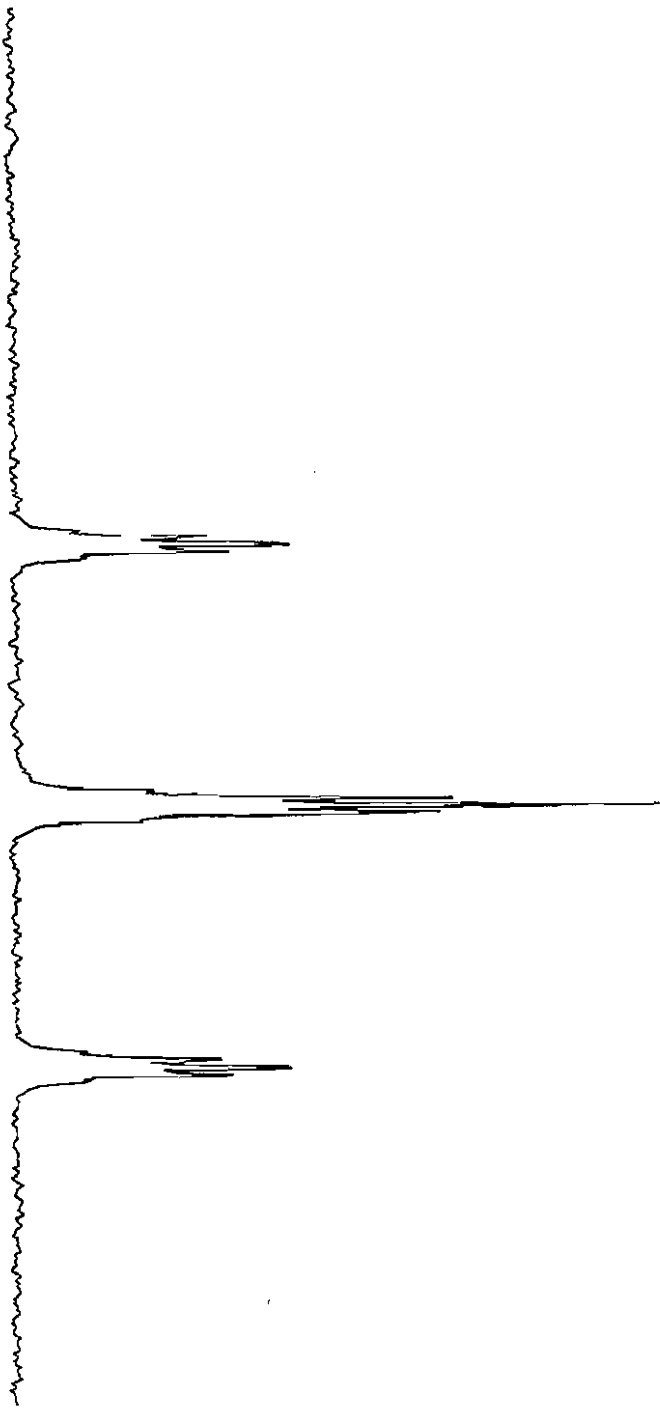

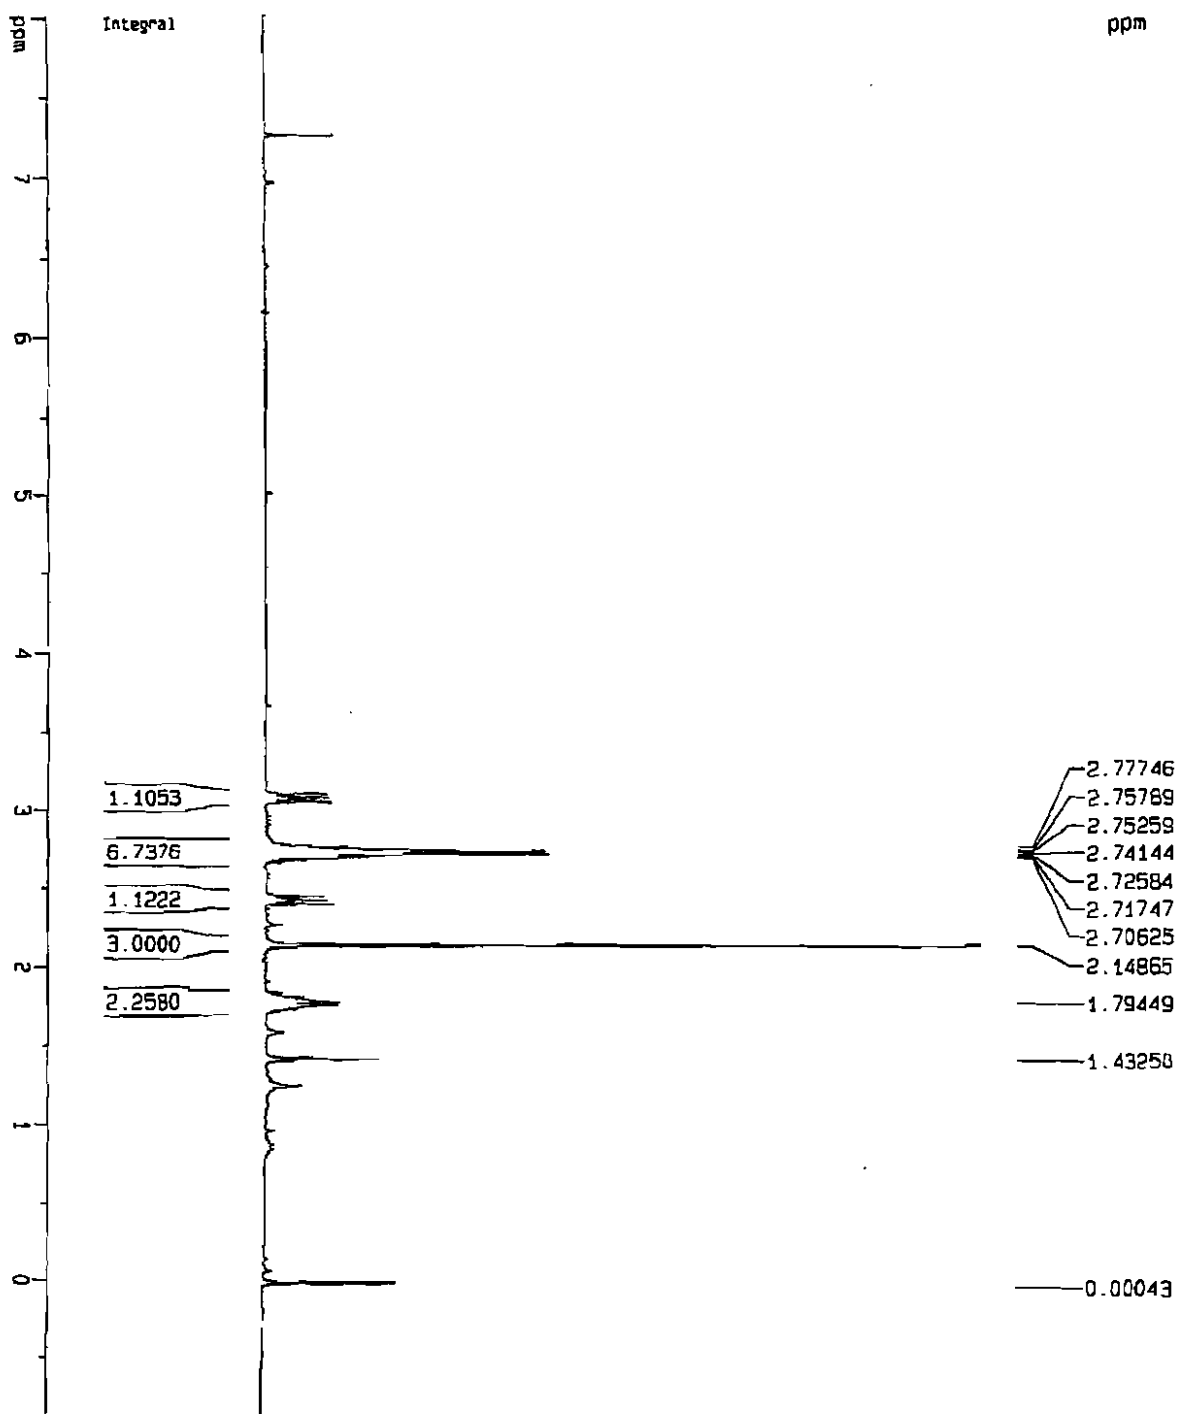

<sup>1</sup>H NMR  
 (CDCl<sub>3</sub>, 300MHz)

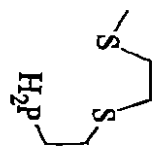

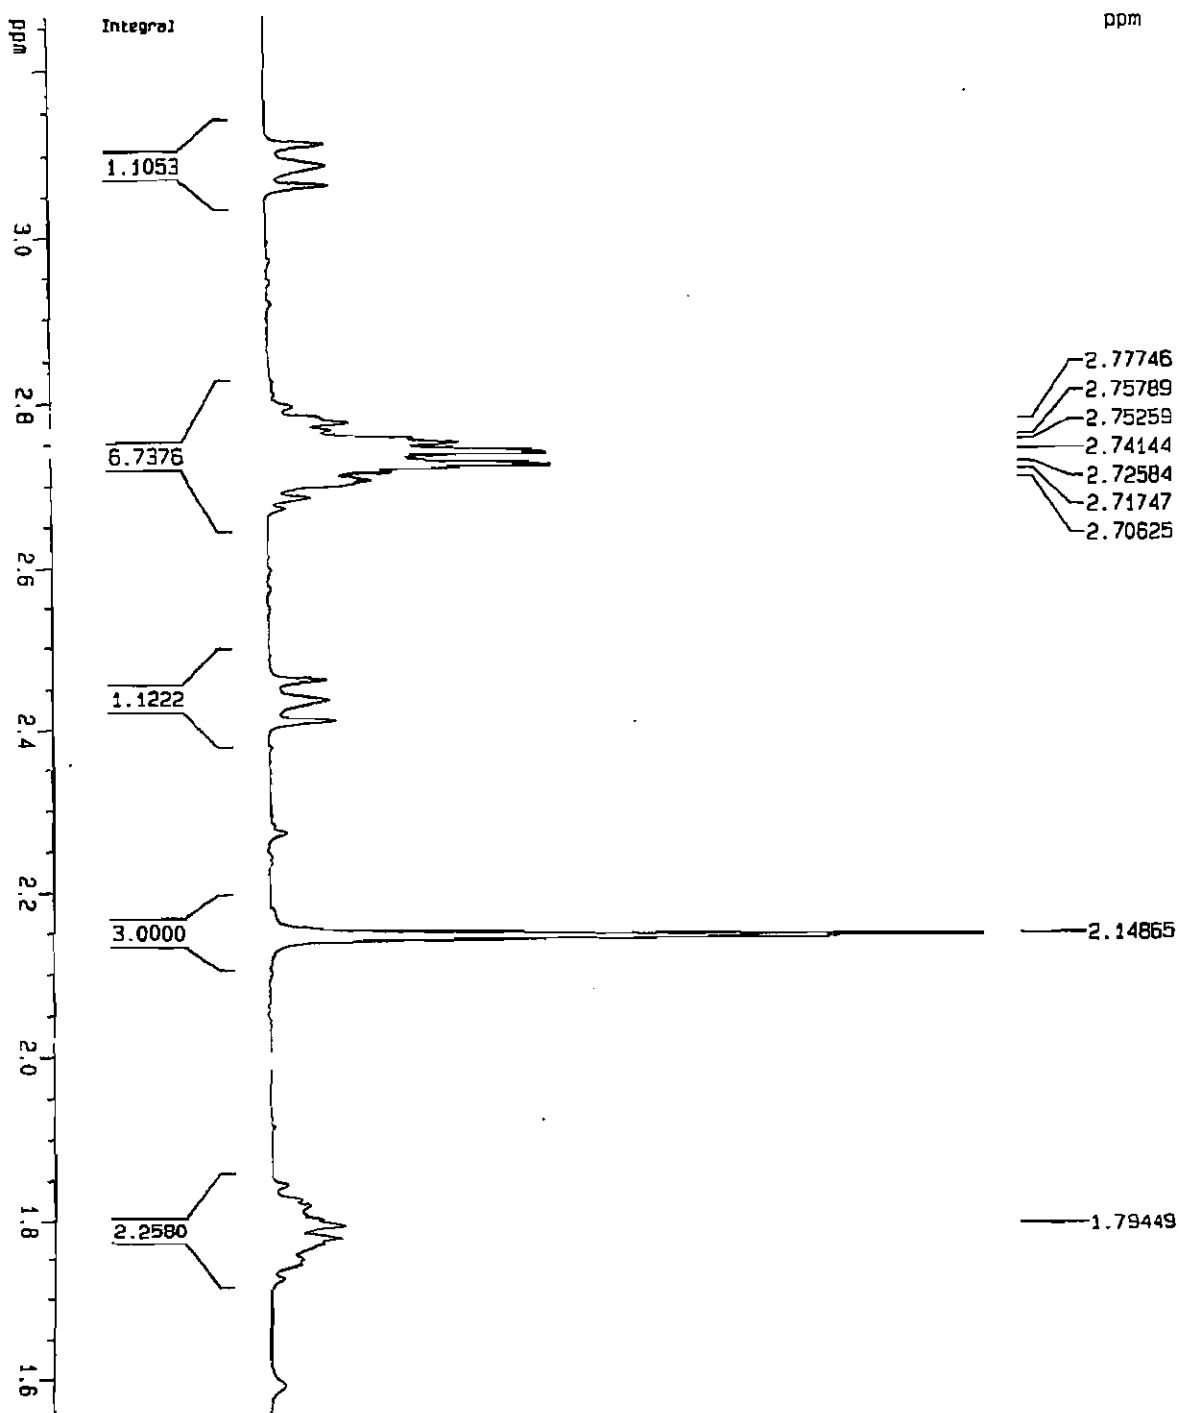

$^1\text{H NMR}$   
 ( $\text{CDCl}_3$ , 300MHz)

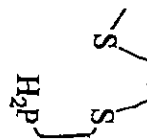

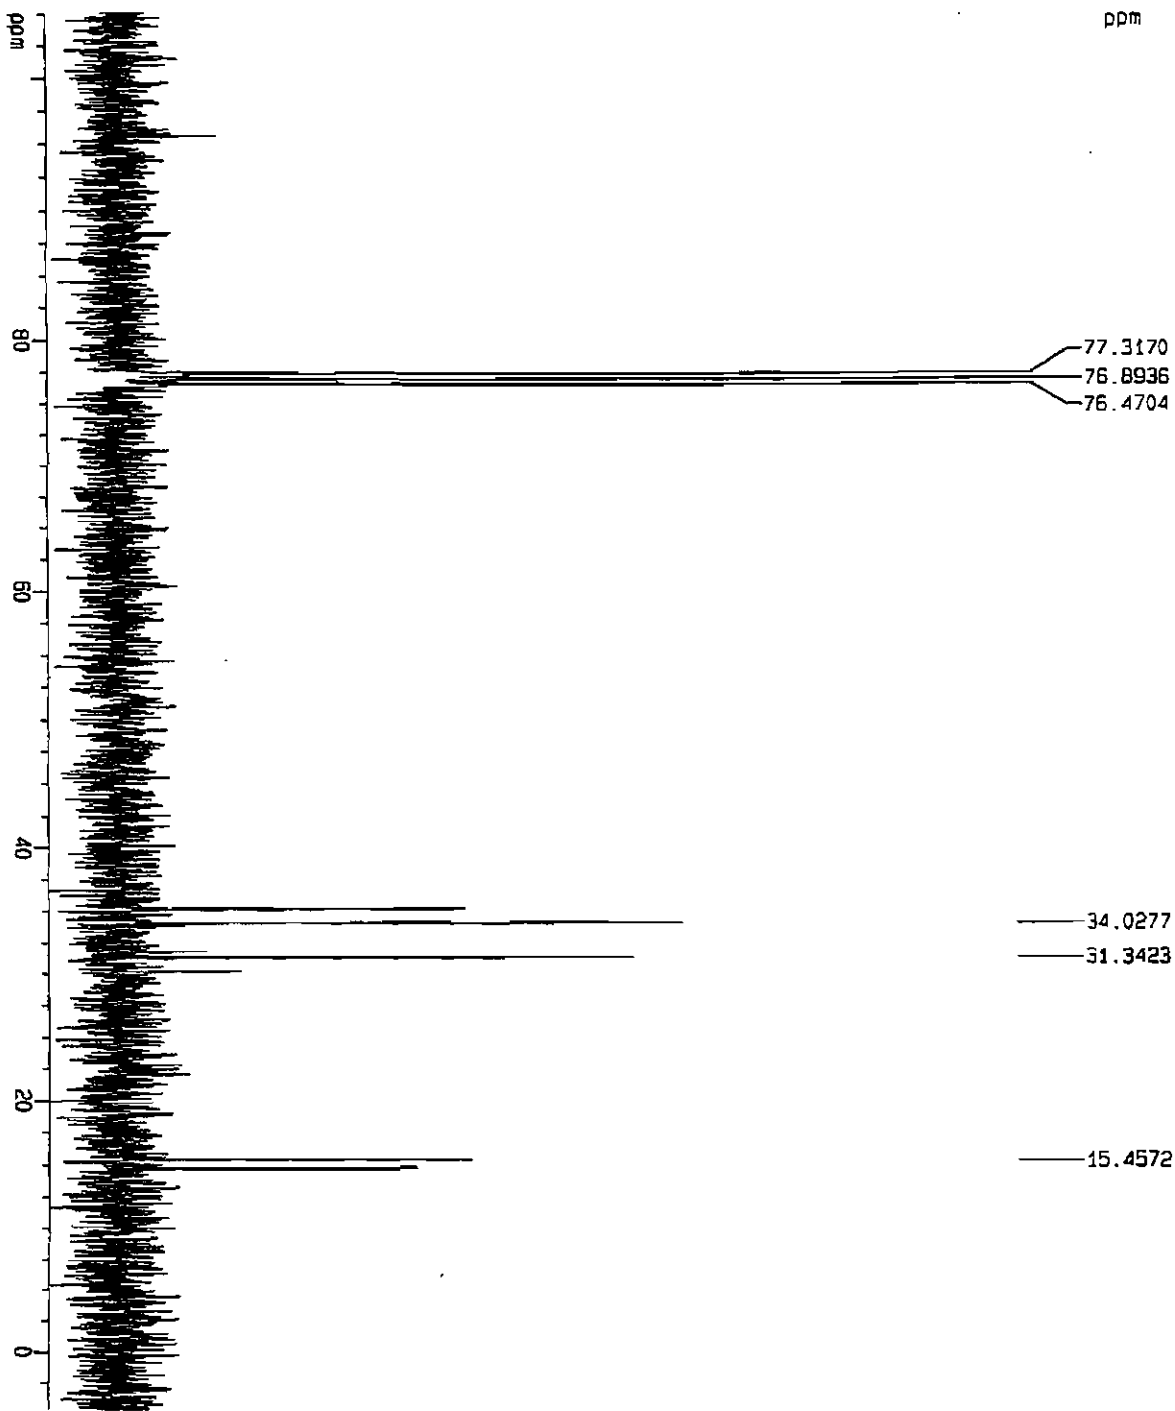

$^{13}\text{C}$  NMR  
(CD<sub>3</sub>, 75 MHz)

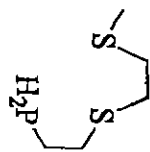

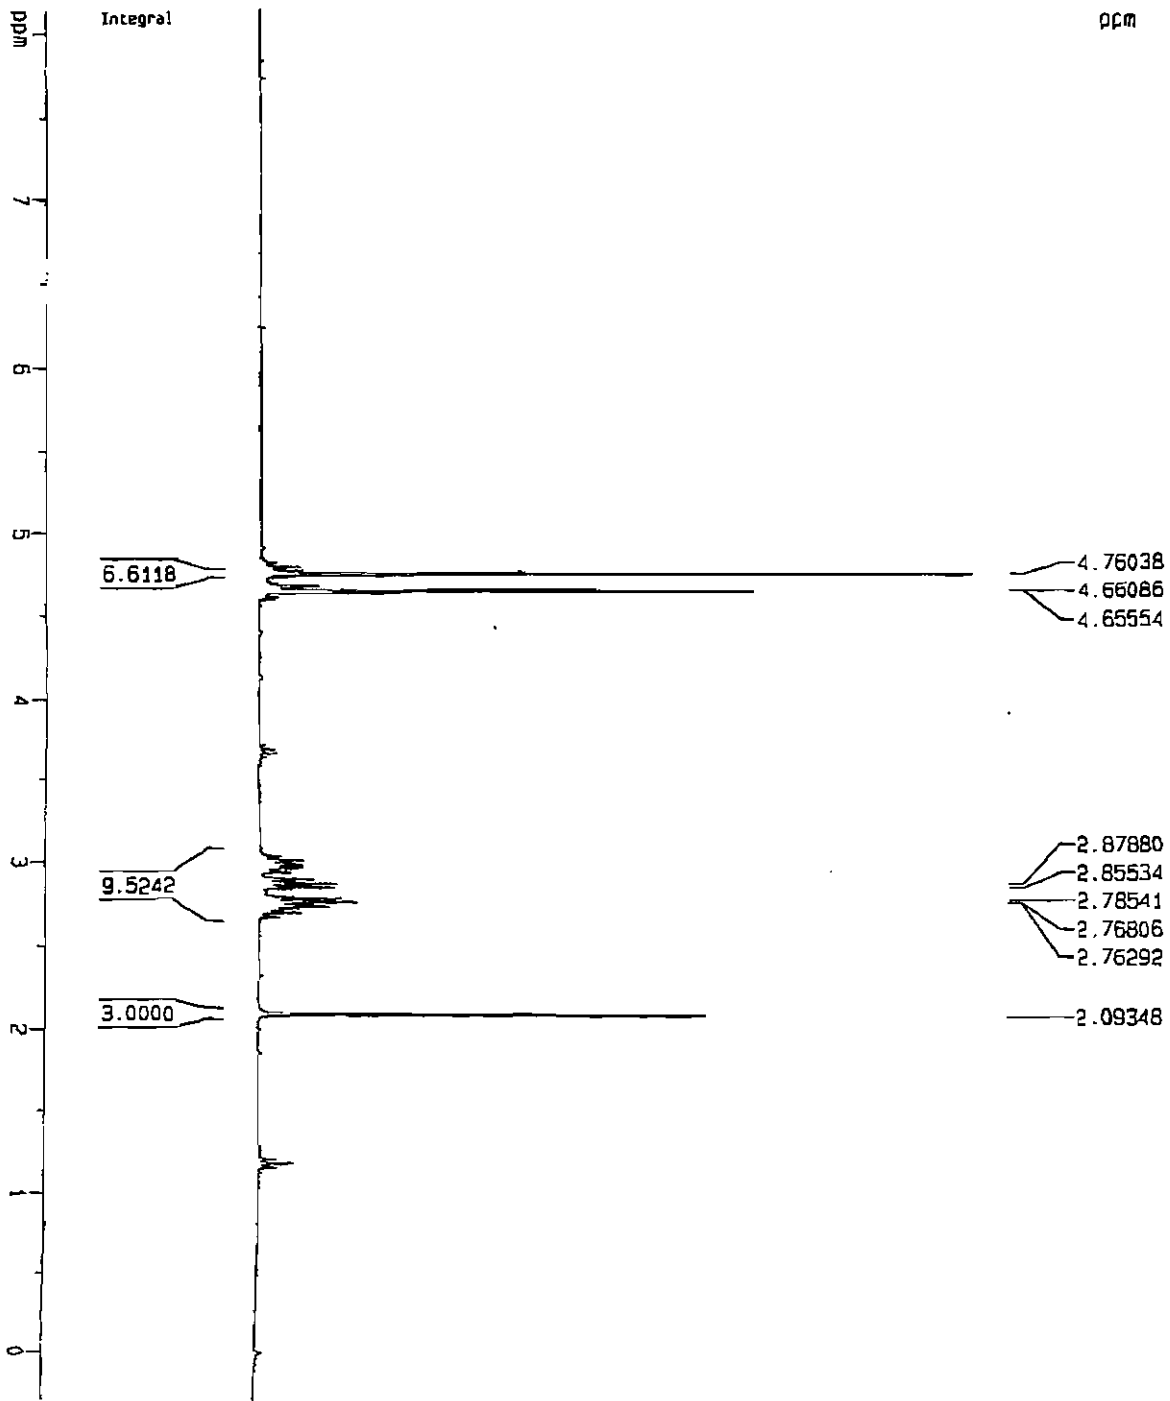

(D<sub>2</sub>O, 300MHz)  
1H NMR

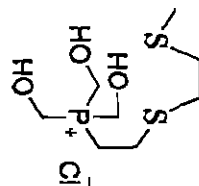

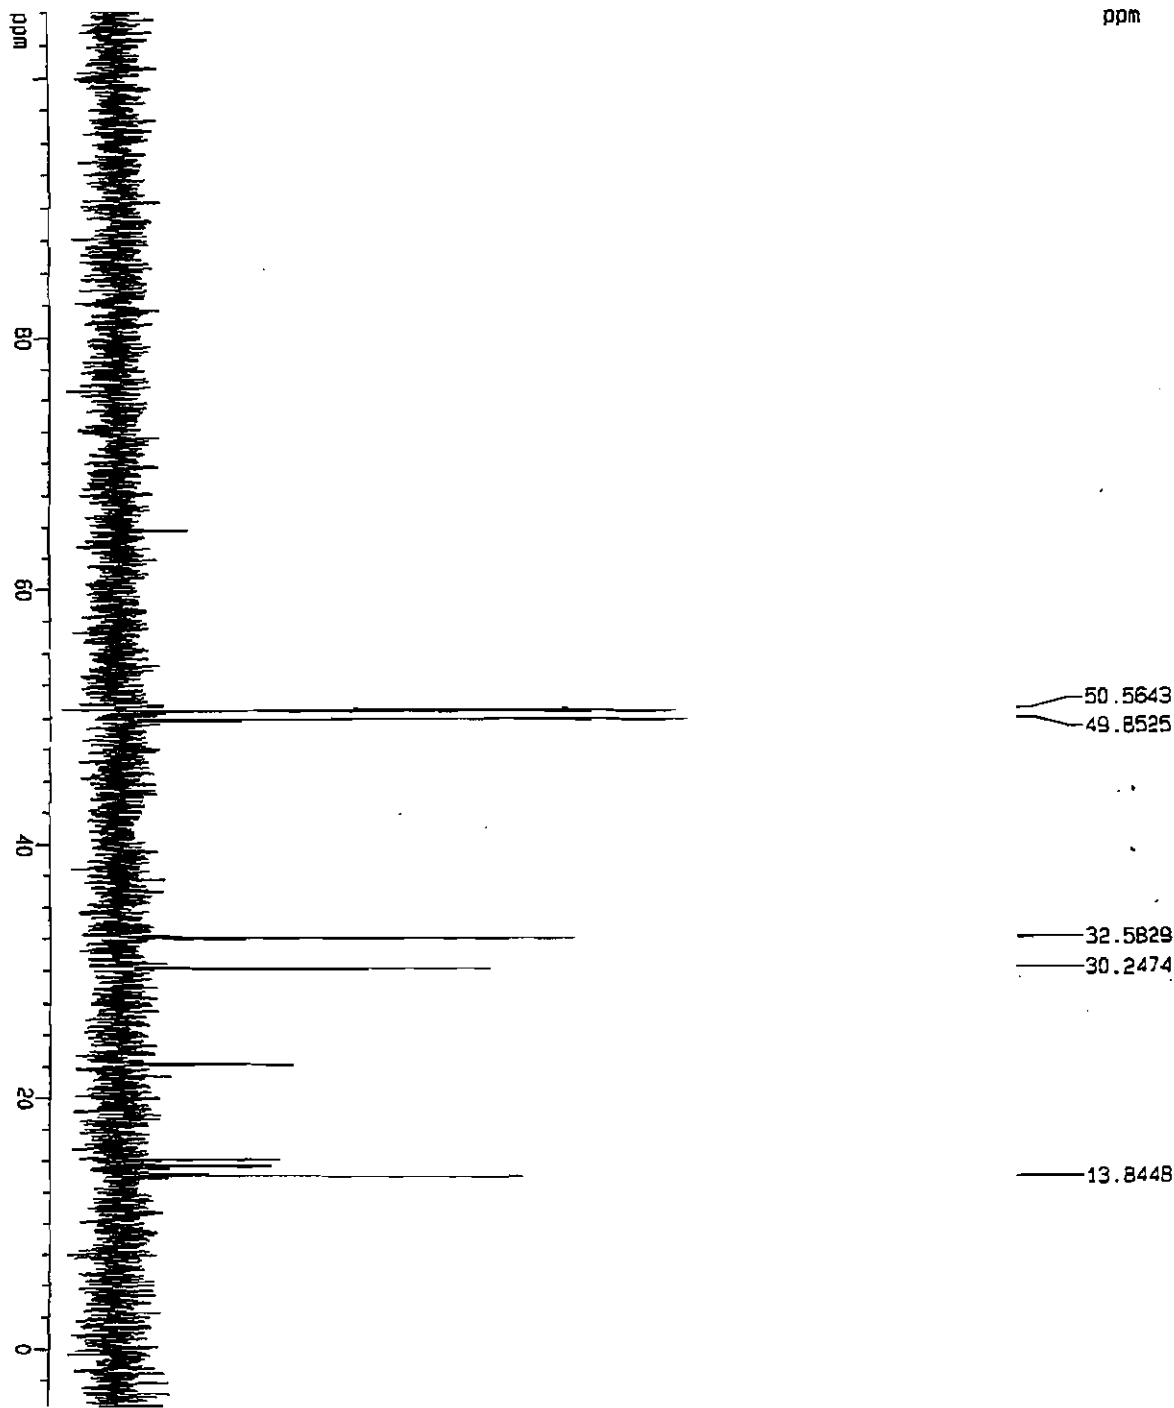

<sup>13</sup>C NMR  
(D<sub>2</sub>O, 75 MHz)

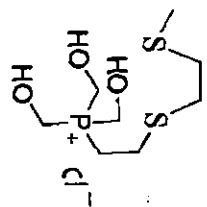



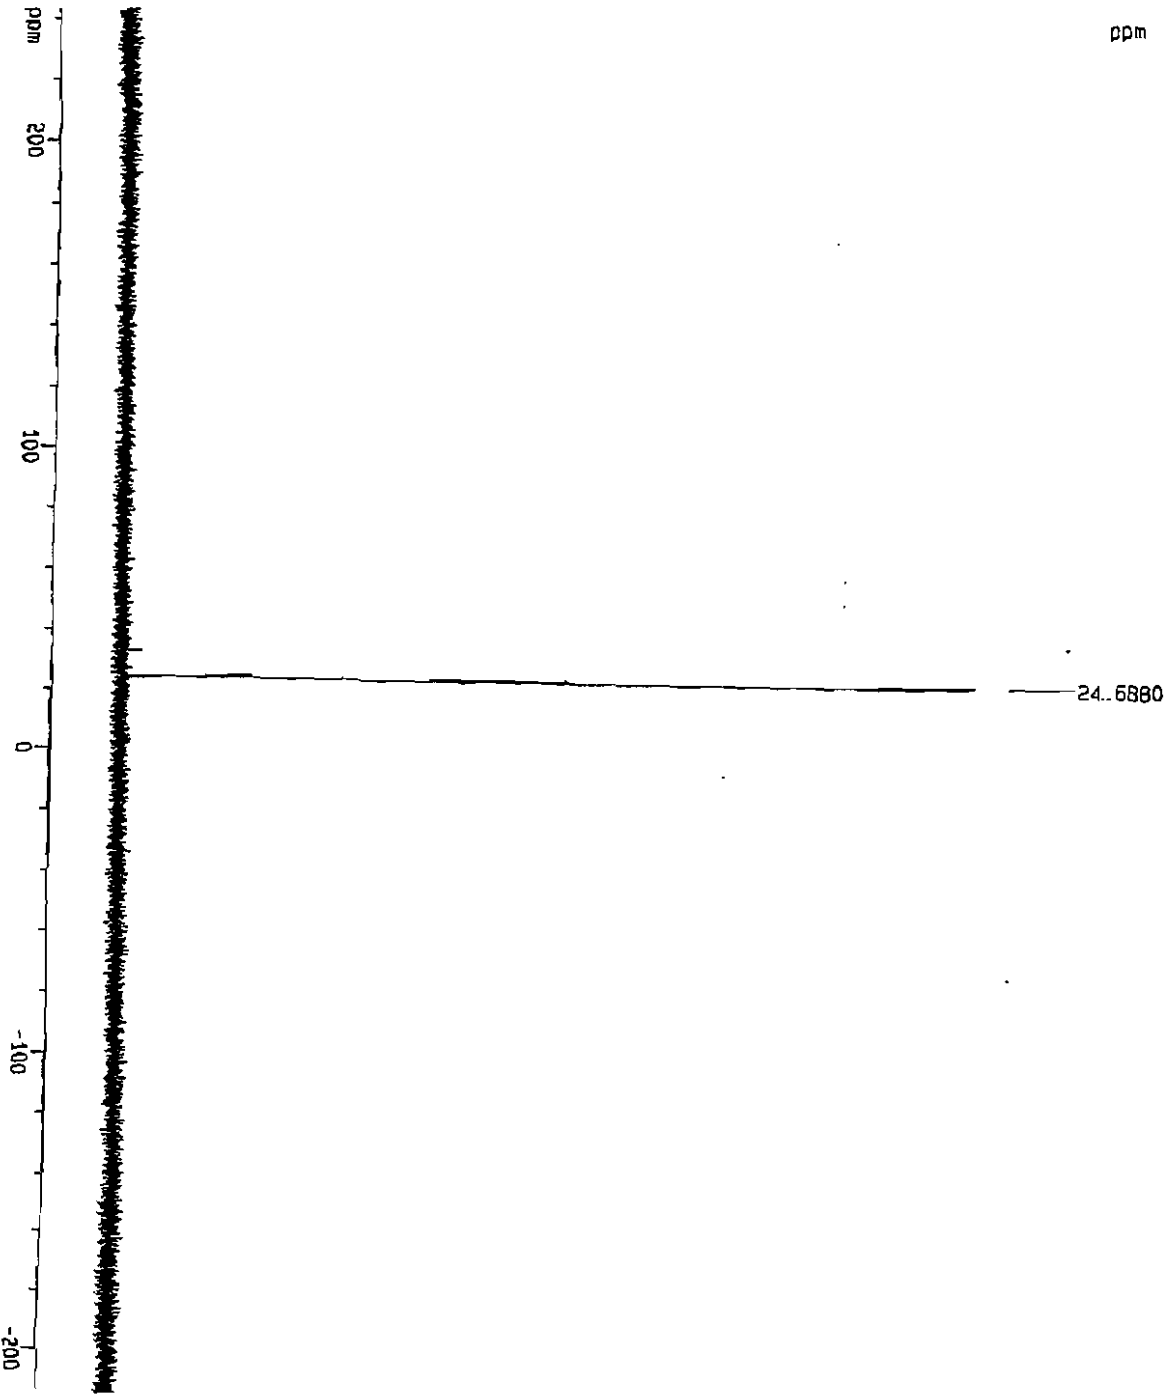

<sup>31</sup>P NMR  
(D<sub>2</sub>O, 121.5 MHz)

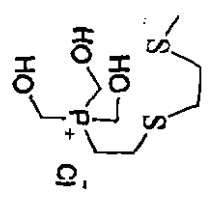

11

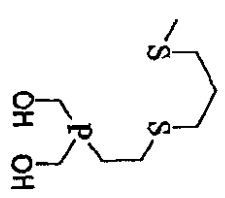

ppm

$\delta$  19.113 NMR  
(D<sub>2</sub>O, 121.5 MHz)

-29.364

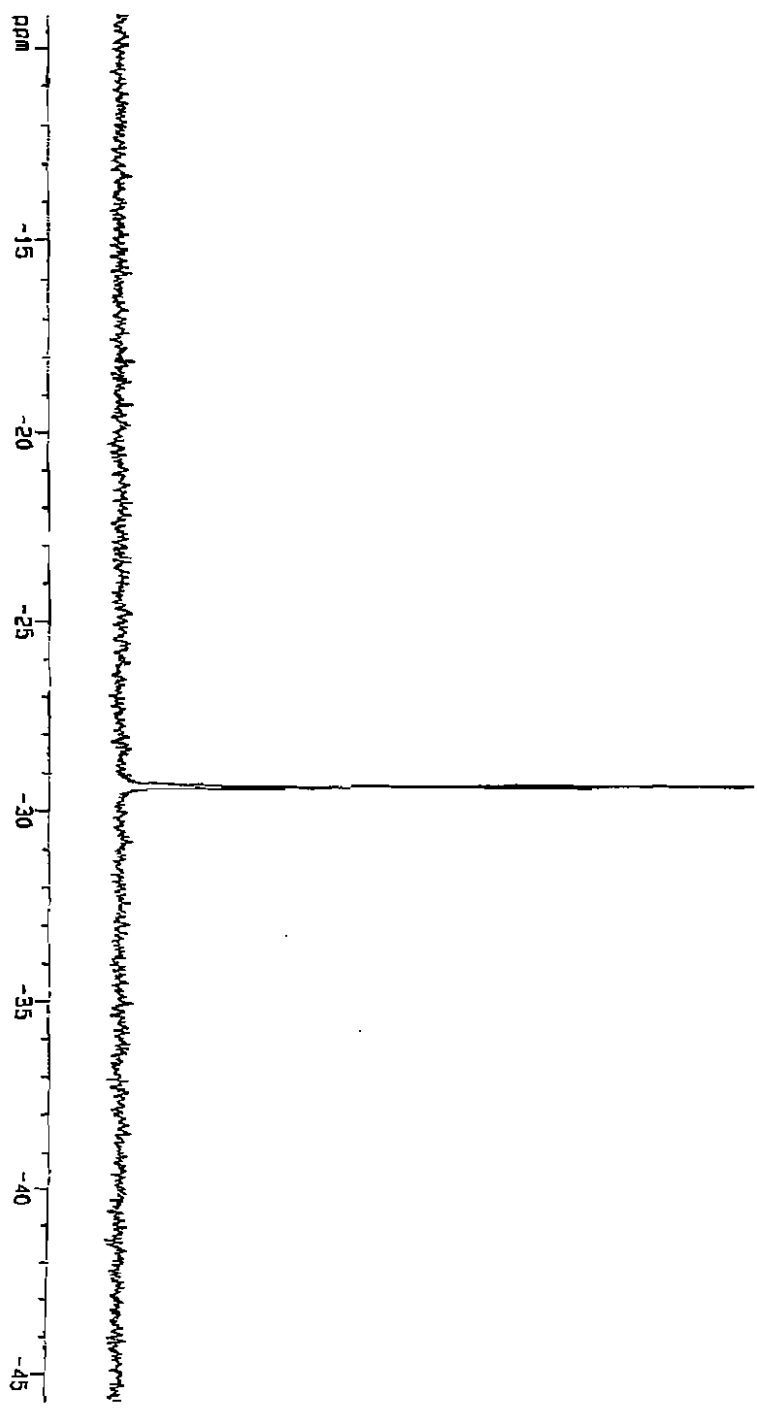

ppm

60

50

40

30

20

ppm

55.0709

58.3725

58.2415

-OH

32.4168

30.1302

29.4084

28.2279

28.0723

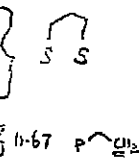

<sup>13</sup>C NMR  
(D<sub>2</sub>O, 75 MHz)

20.2344

20.1155

9 -CH<sub>3</sub>

14.4568

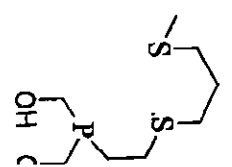

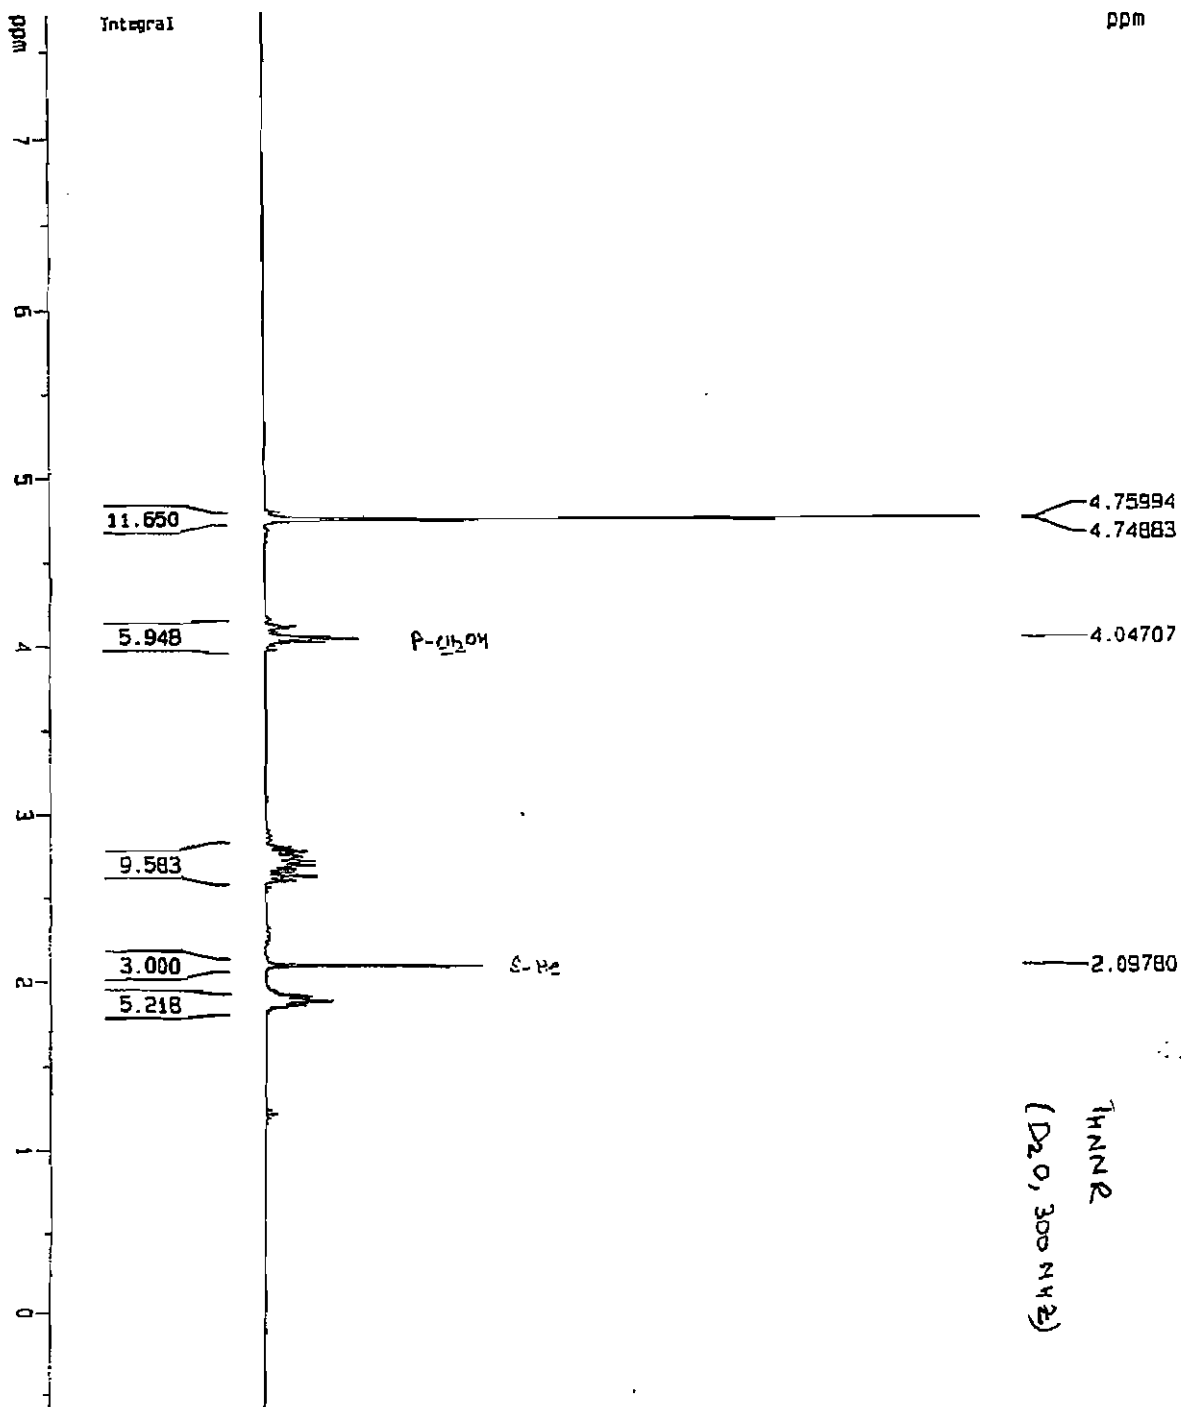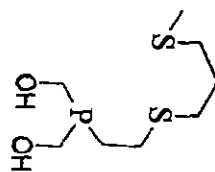

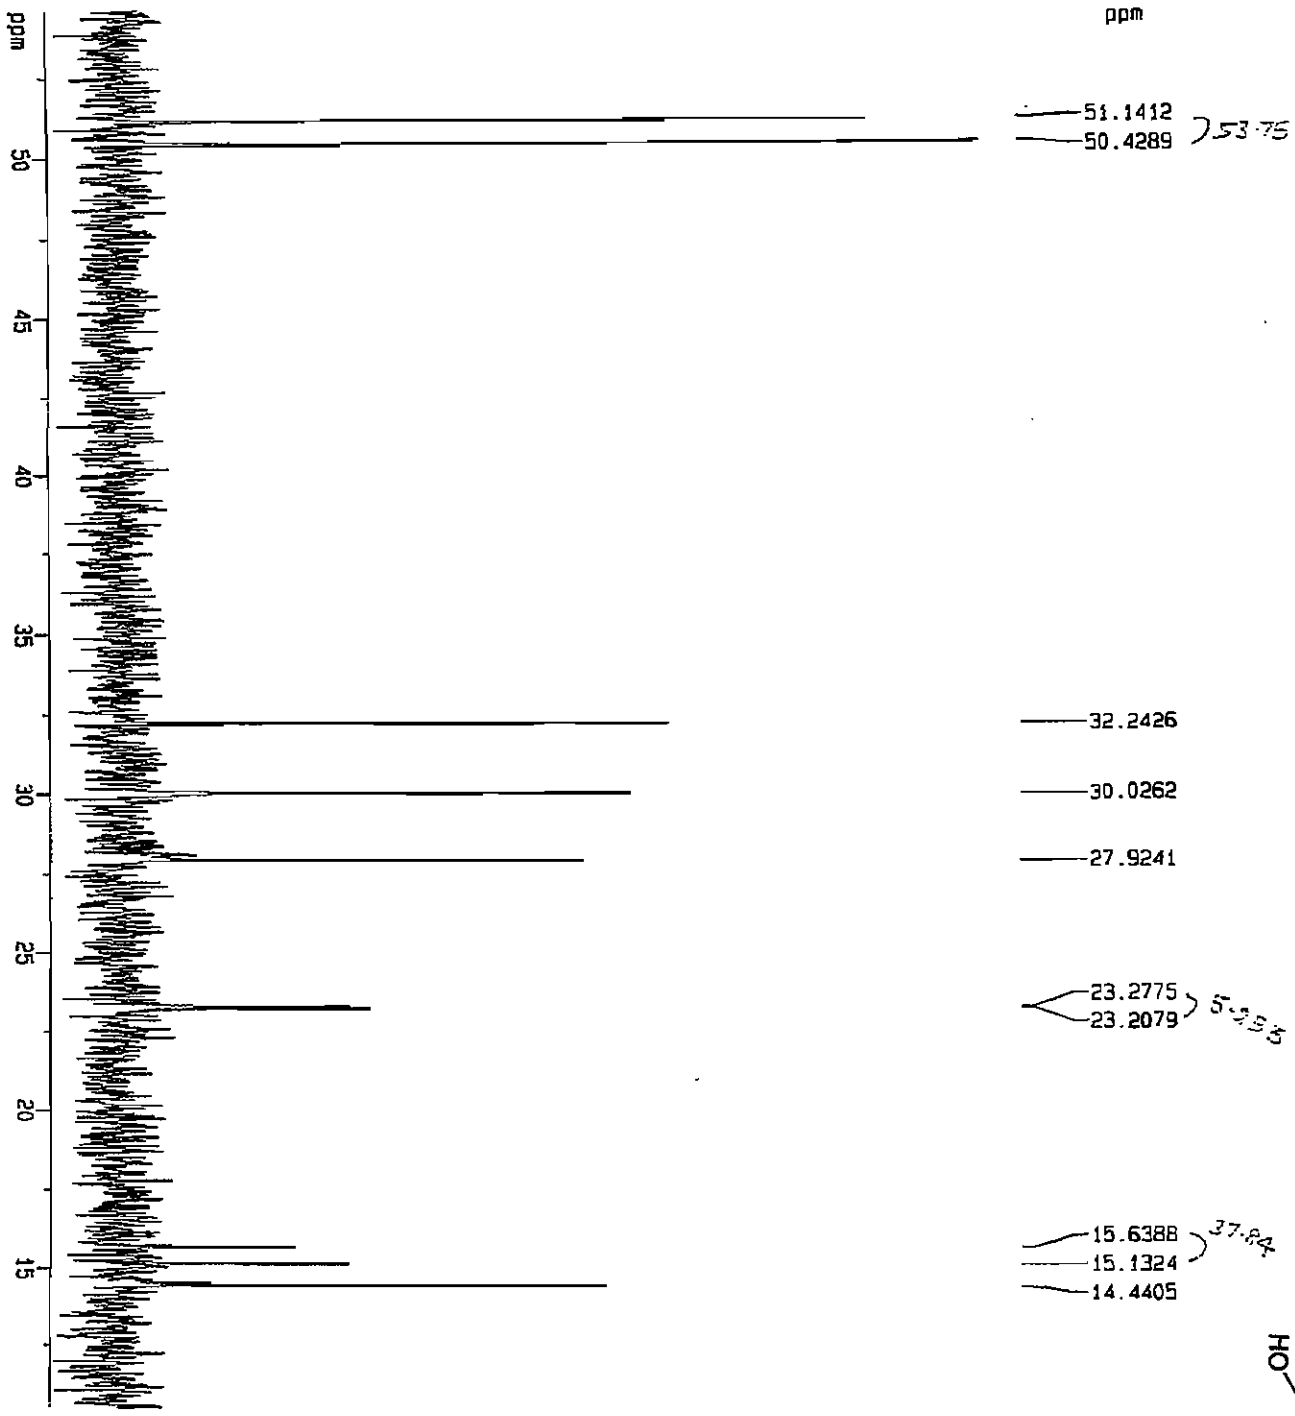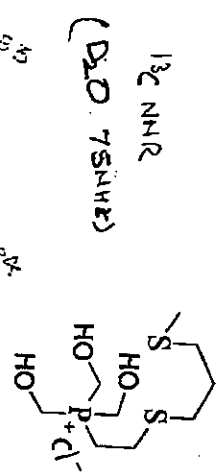

ppm  
200  
100  
0  
-100  
-200

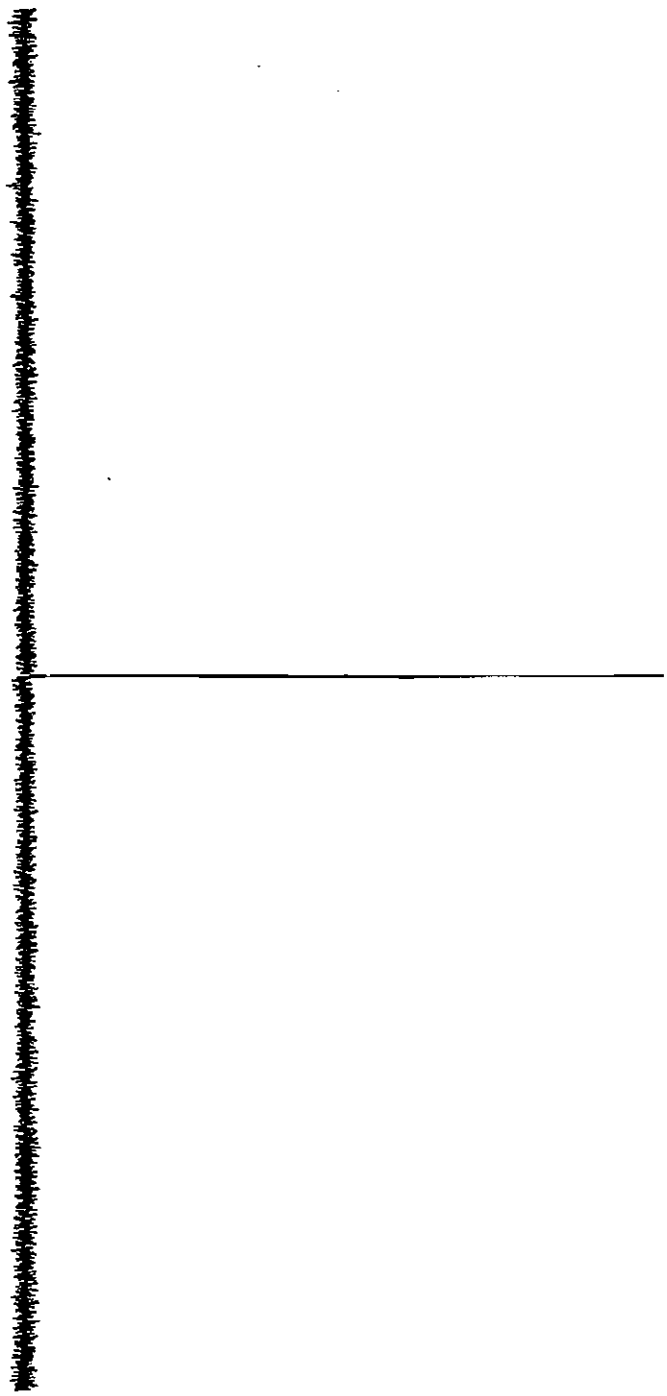

ppm

24.7846

$^{31}\text{P NMR}$   
( $\text{D}_2\text{O}$ , 121.5 MHz)

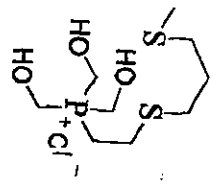

ppm

Integral

ppm

1.9087  
1.0035  
6.4889  
0.9926  
2.0482  
9.6173

3.08880  
3.00629  
2.98135  
2.78743  
2.78192  
2.77257  
2.75711  
2.72356  
2.71074  
2.70339  
2.69676  
2.67905  
2.67380  
2.65846  
2.65313  
2.63271  
2.35714  
2.33187  
1.72564  
1.70729  
1.41075  
1.36058  
0.00027

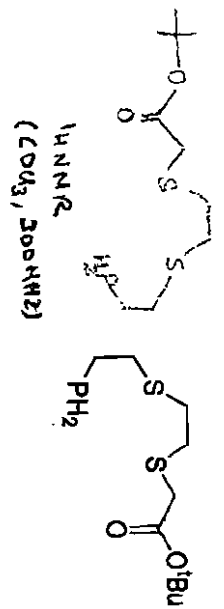

<sup>13</sup>C NMR  
(CDCl<sub>3</sub>, 75 MHz)

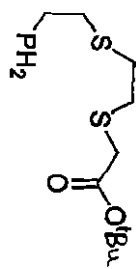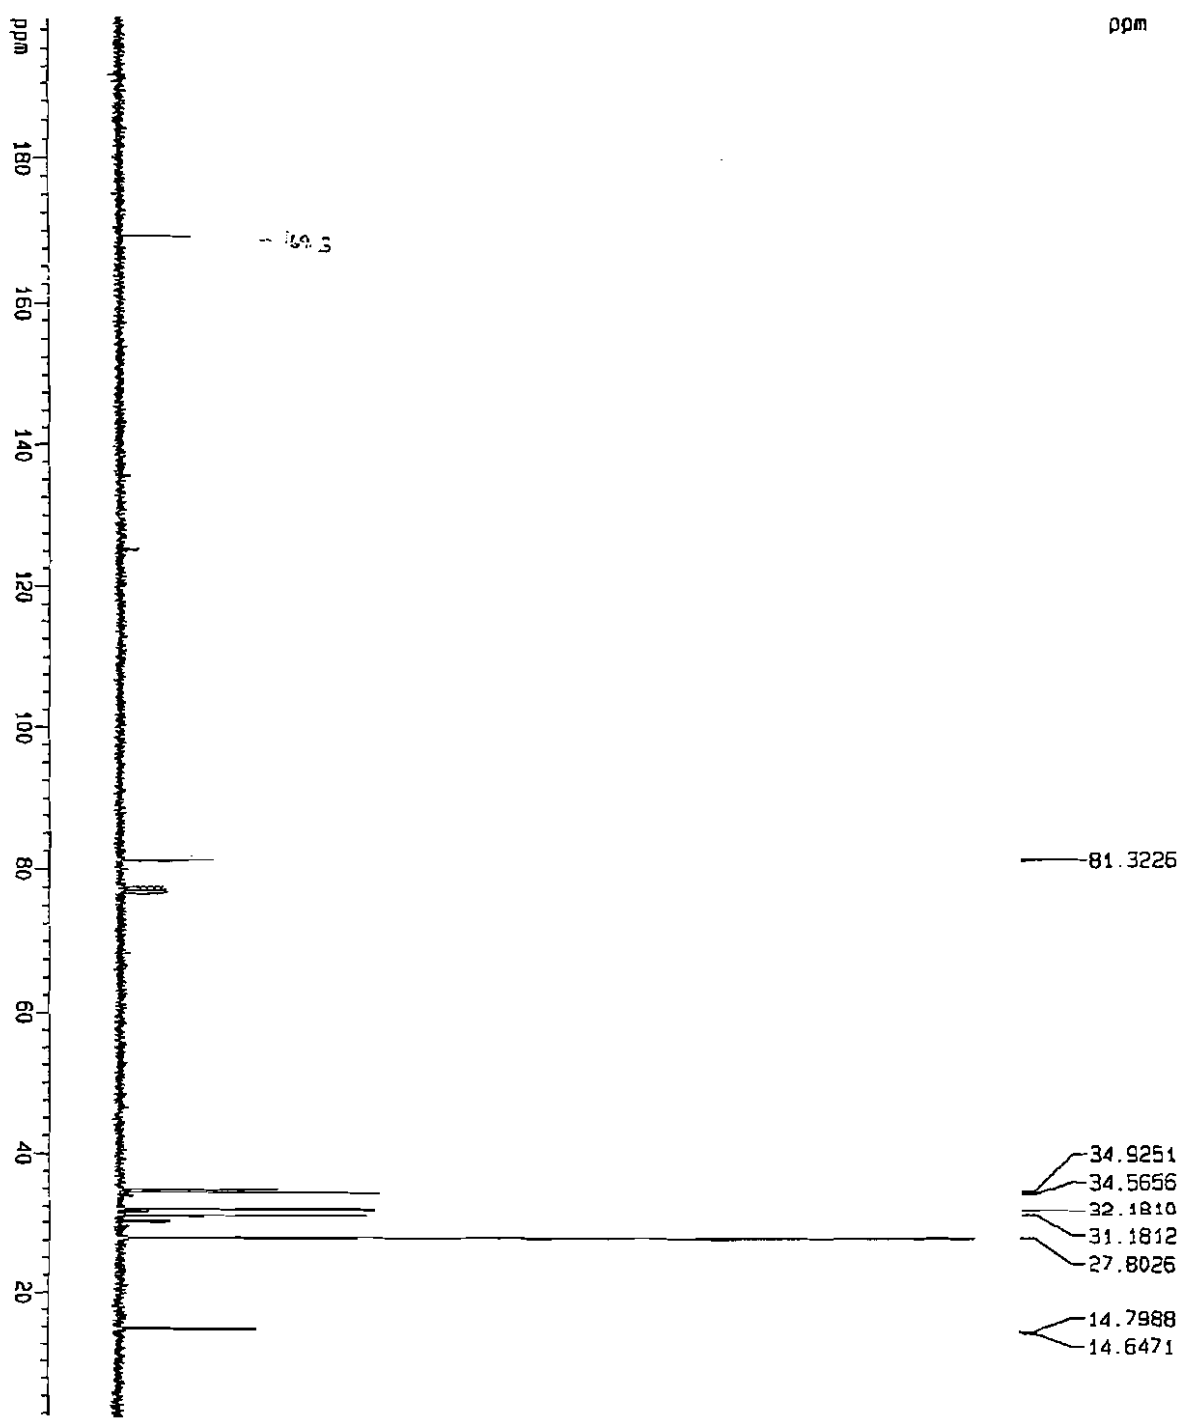



3P{<sup>1</sup>H}NMR  
(CDCl<sub>3</sub>, 21 MHz)

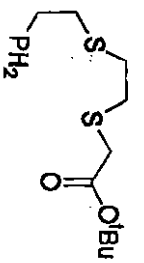

ppm

-140.92

ppm 200 150 100 50 0 -50 -100 -150 -200

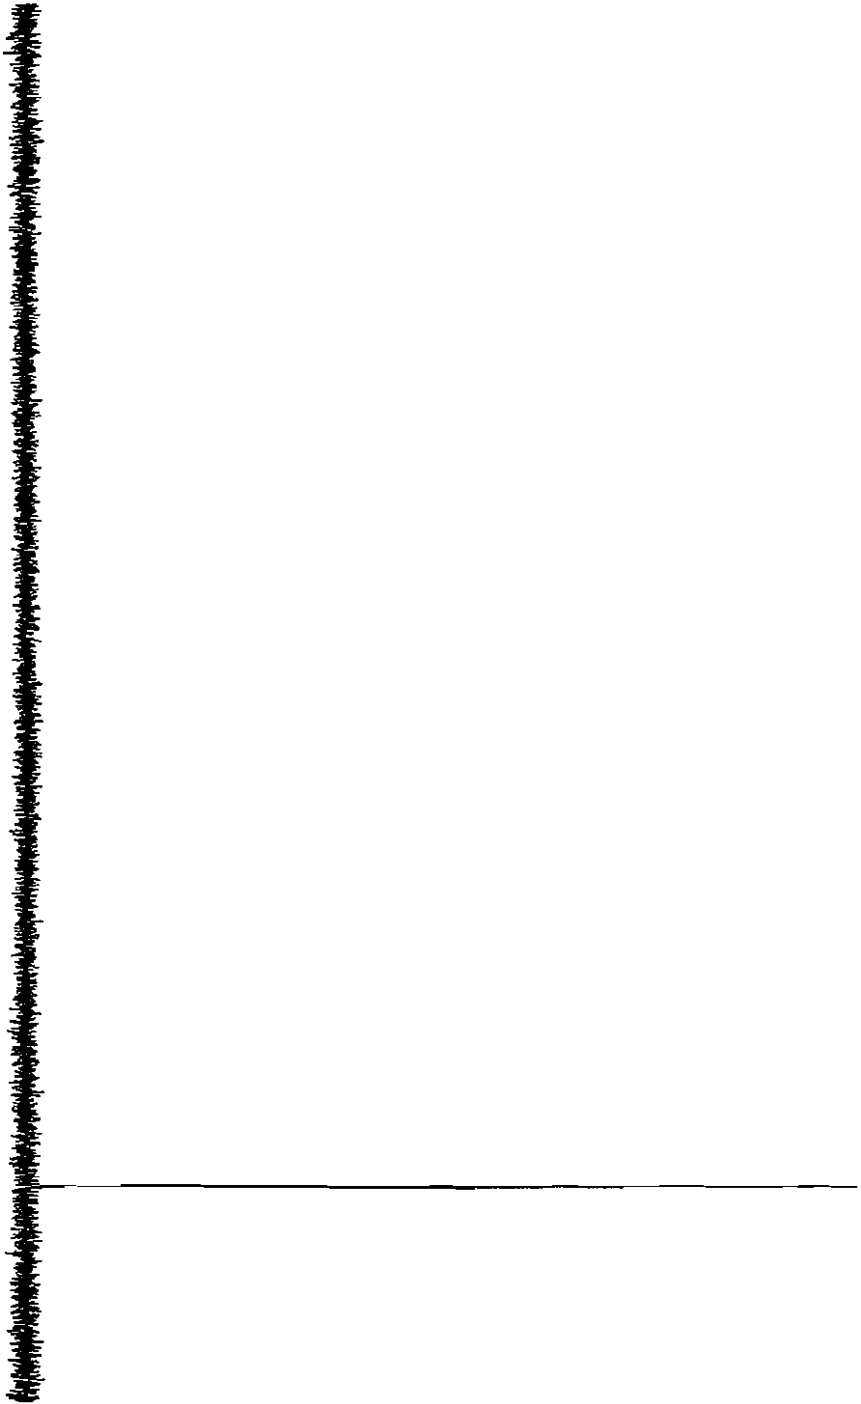

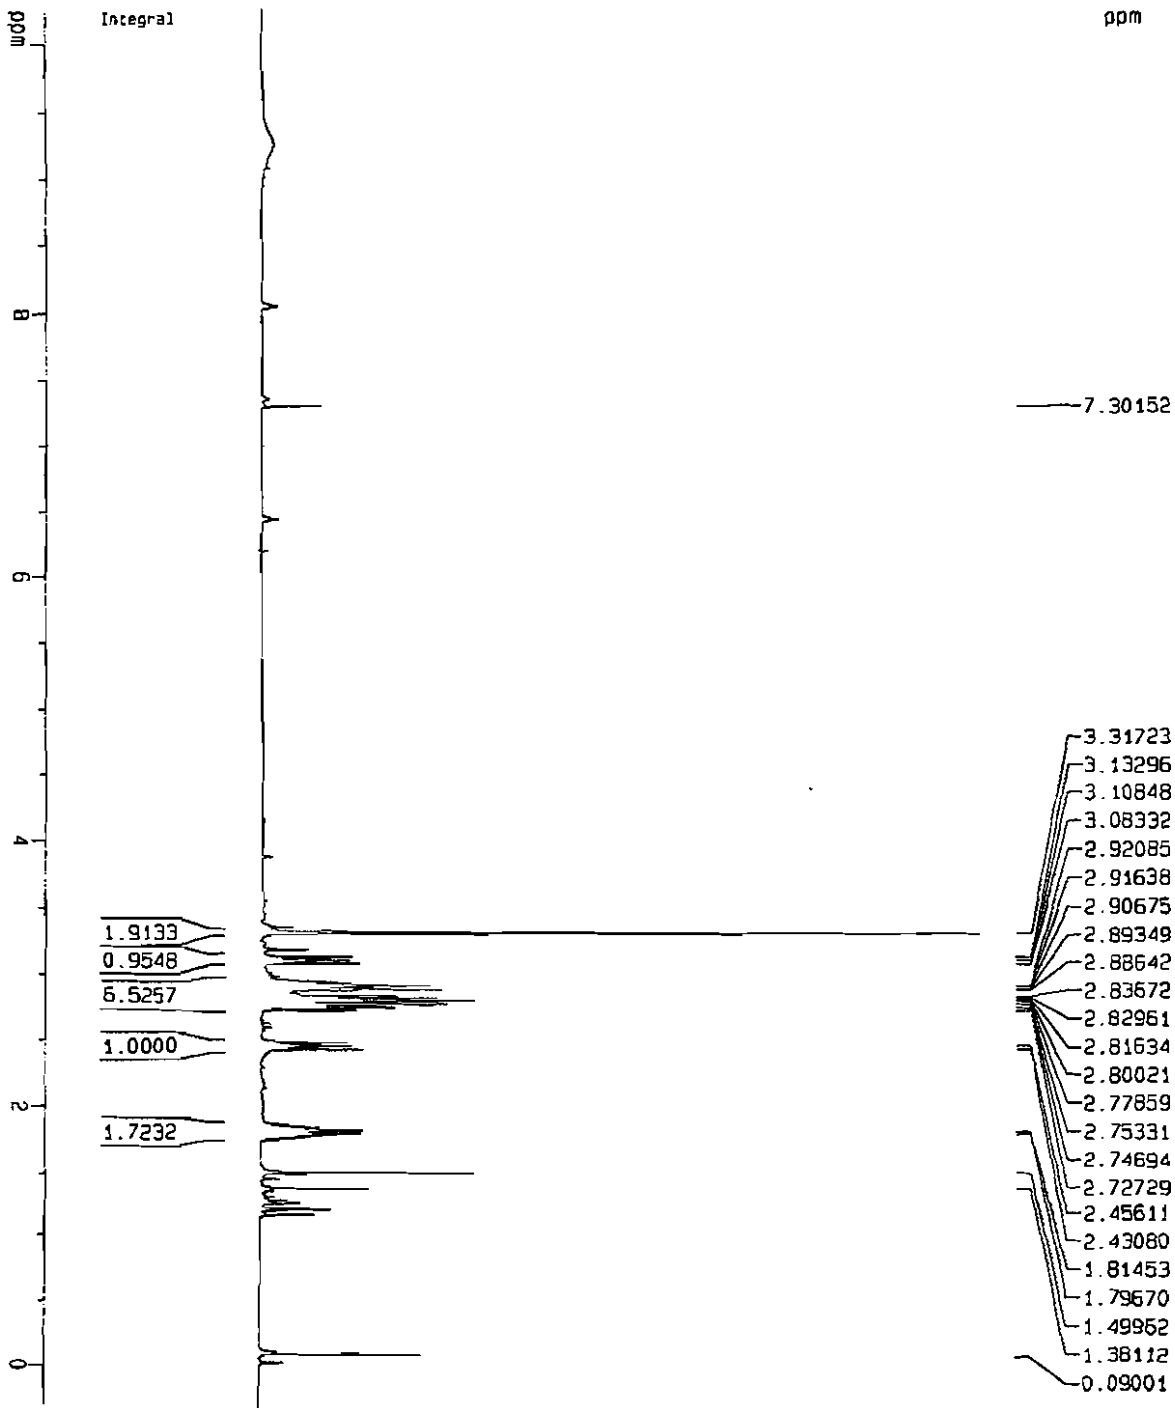

1H NMR  
(CDCl<sub>3</sub>, 300 MHz)

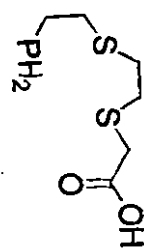

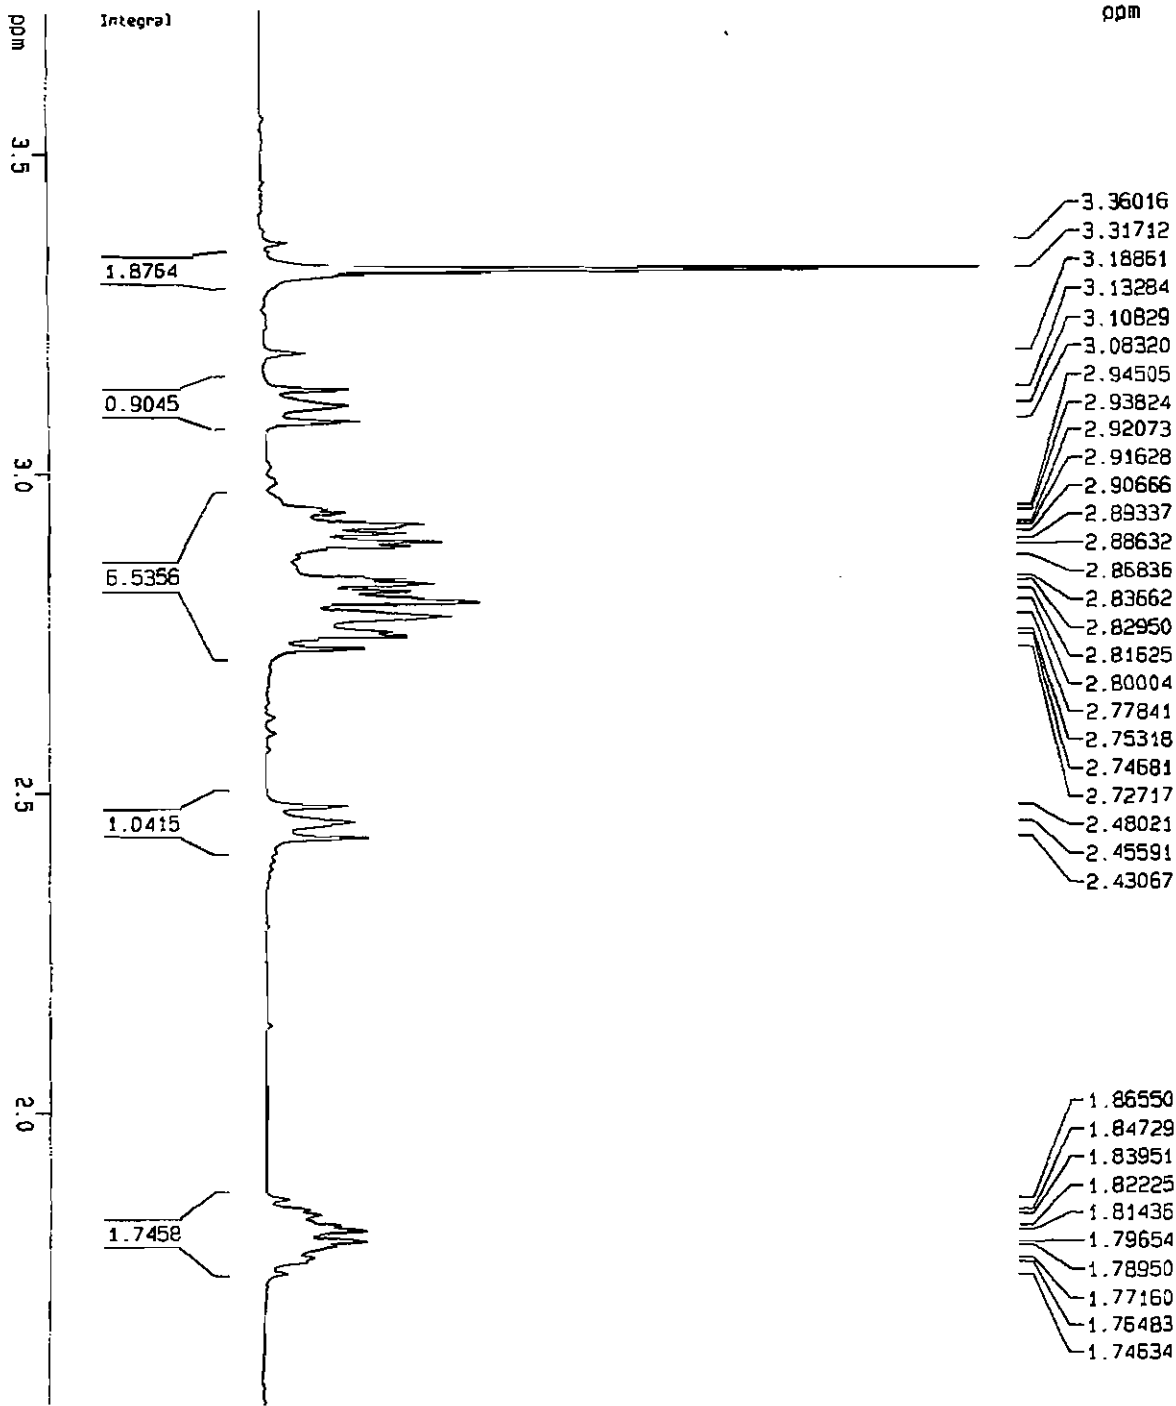

<sup>1</sup>H NMR  
(CDCl<sub>3</sub>, 300 MHz)

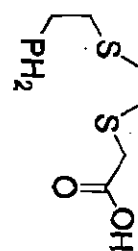

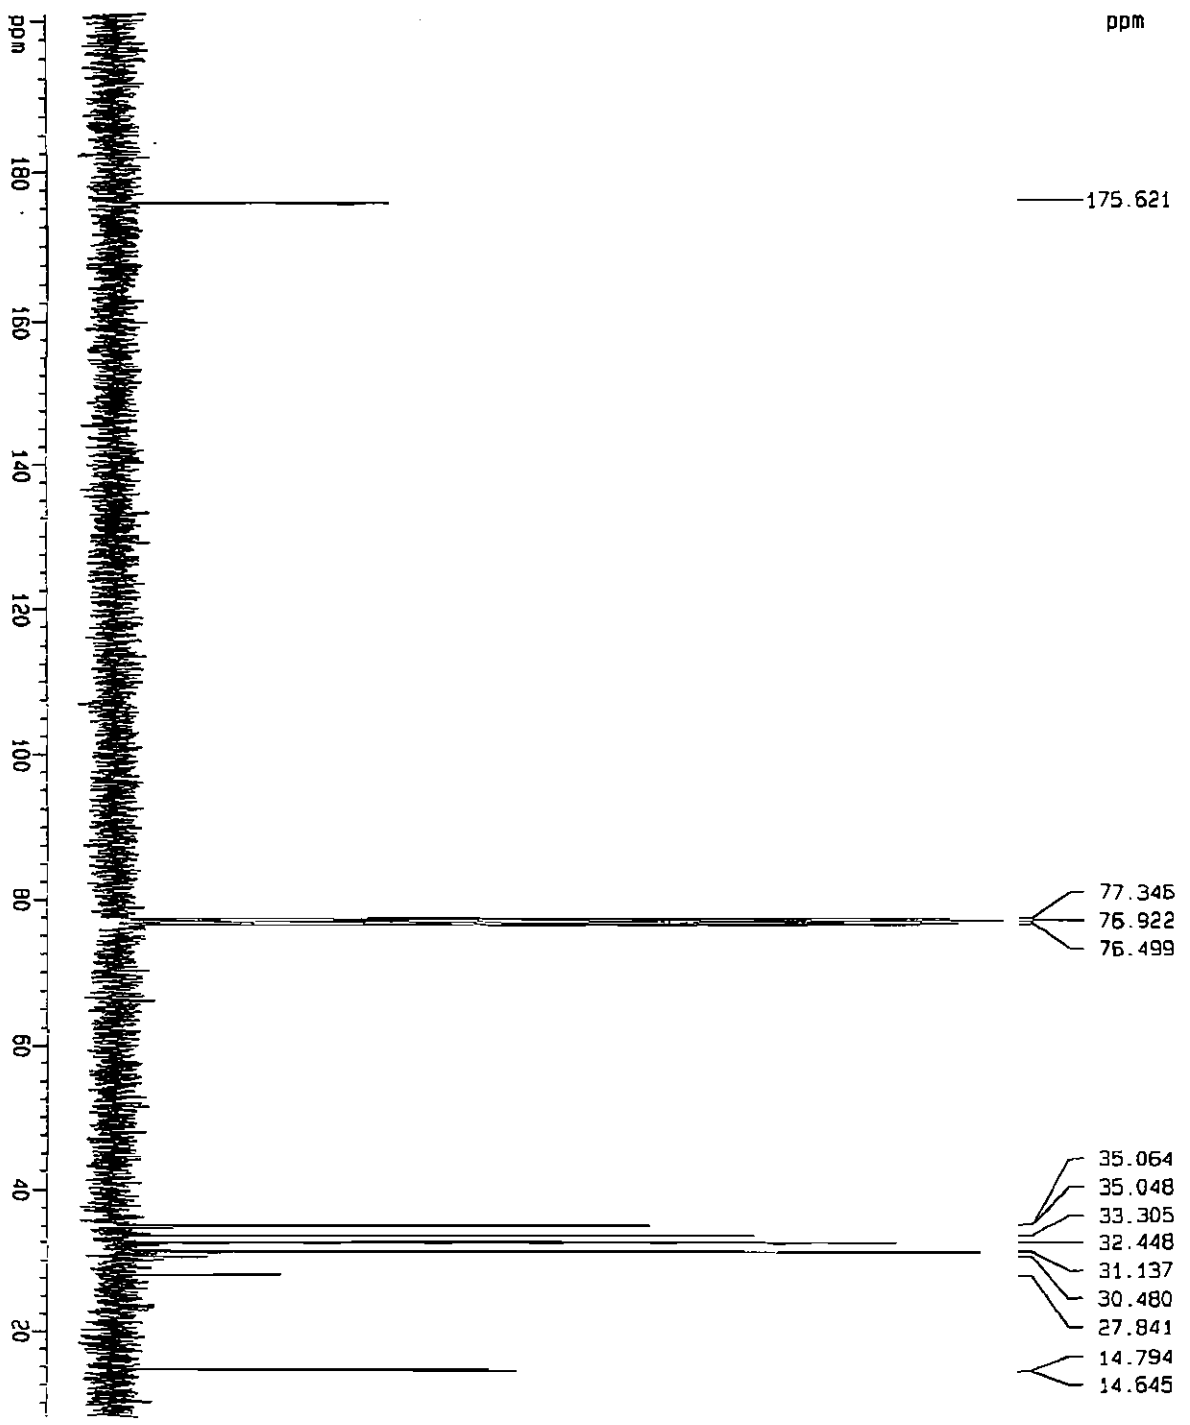

<sup>13</sup>C NMR  
(CDCl<sub>3</sub>, 75MHz)

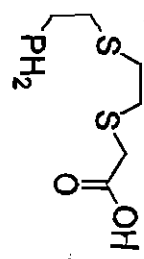

SPS<sub>3</sub>NNR  
(DUGPZT.NHE)

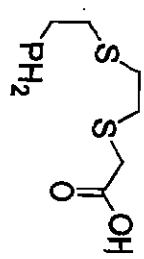

ppm

ppm 200 150 100 50 0 -50 -100 -150 -200

141.25

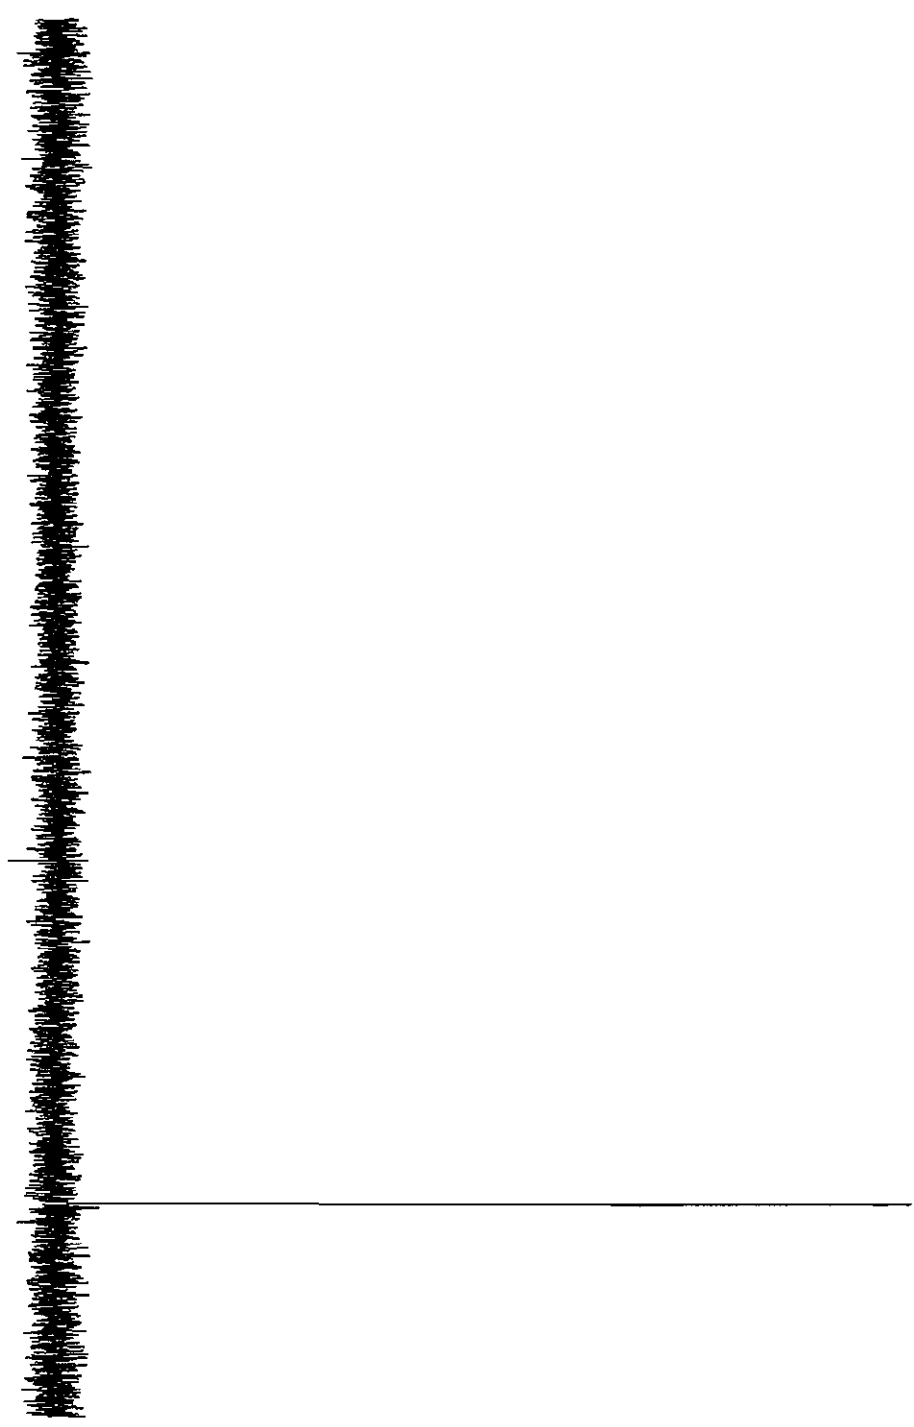

Supplement: NIHMS687517-supplement-Supp_info.pdf [file NIHMS687517-supplement-Supp_info.pdf]
